# Supplementary material
Source: Elsevier journal article supplement (https://rcastoragev2.blob.core.windows.net/a7de71860f6b29e04ddc7dd092b740d3/mmc1.pdf)
Supplement: mmc1 [file mmc1.pdf]

# THE LANCET

## Supplementary appendix

This appendix formed part of the original submission and has been peer reviewed.  
We post it as supplied by the authors.

Supplement to: Nazarzadeh M, Bidel Z, Canoy D, et al. Blood pressure lowering and risk of new-onset type 2 diabetes: an individual participant data meta-analysis. *Lancet* 2021; **398**: 1803–10.

## Supplementary materials

### **Blood pressure lowering and risk of new-onset type 2 diabetes: an individual participant data meta-analysis**

Milad Nazarzadeh <sup>1,2</sup>, Zeinab Bidel <sup>1,2</sup>, Dexter Canoy <sup>1,2,3</sup>, Emma Copland <sup>1,2</sup>, Malgorzata Wamil <sup>1</sup>, Jeannette Majert <sup>1,2</sup>, Karl Smith Byrne <sup>4</sup>, Johan Sundström <sup>5</sup>, Koon Teo <sup>6</sup>, Barry R Davis <sup>7</sup>, John Chalmers <sup>8</sup>, Carl J. Pepine <sup>9</sup>, Abbas Dehghan <sup>10</sup>, Derrick A Bennett <sup>3,11</sup>, George Davey Smith <sup>12</sup>, Kazem Rahimi <sup>1,2,3 \*</sup>, The Blood Pressure Lowering Treatment Trialists' Collaboration †

<sup>1</sup> Deep Medicine, Oxford Martin School, University of Oxford, UK

<sup>2</sup> Nuffield Department of Women's and Reproductive Health, Medical Science Division, University of Oxford, UK

<sup>3</sup> NIHR Oxford Biomedical Research Centre, Oxford University Hospitals NHS Foundation Trust, Oxford, UK

<sup>4</sup> International Agency for Research on Cancer/World Health Organization (IARC/WHO), Genomic Epidemiology branch, Lyon, France

<sup>5</sup> Clinical Epidemiology Unit, Department of Medical Sciences, Uppsala University, Sweden

<sup>6</sup> Population Health Research Institute, McMaster University, Hamilton, Ontario, Canada

<sup>7</sup> The University of Texas School of Public Health, Houston, Texas, USA

<sup>8</sup> The George Institute for Global Health, University of New South Wales, Sydney, Australia

<sup>9</sup> Department of Medicine, University of Florida, Gainesville, Florida, USA

<sup>10</sup> Department of Biostatistics and Epidemiology, School of Public Health, Imperial College London, UK

<sup>11</sup> Clinical Trial Service Unit and Epidemiological Studies Unit, Nuffield Department of Population Health, University of Oxford, Oxford, UK

<sup>12</sup> MRC Integrative Epidemiology Unit, University of Bristol, Bristol, UK

#### **\* Corresponding author: Kazem Rahimi**

Deep Medicine, Nuffield Department of Women's and Reproductive Health, University of Oxford, Oxford, United Kingdom; email address:

[kazem.rahimi@wrh.ox.ac.uk](mailto:kazem.rahimi@wrh.ox.ac.uk); Tel: +44 (0) 1865 617200; Fax: +44 (0) 1865 617202; Postal code and address: 1st Floor, Hayes House, 75

George Street, Oxford, OX1 2BQ, United Kingdom

#### **† The Blood Pressure Lowering Treatment Trialists' Collaboration**

*Steering Committee:* Kazem Rahimi (Chair), Koon Teo, Barry R Davis, John Chalmers, Carl J Pepine

*Collaborating Trialists:* Ajay K Gupta, Alberto Zanchetti, Ale Algra, Amanda Adler, Anushka Patel, Barry R Davis, Bertram Pitt, Carl J Pepine, Christopher Reid, Christopher J Bulpitt, Christopher R Palmer, Edmund Lewis, Eivind Berge, Folkert W Asselbergs, Frank P J Brouwers, Gianpaolo Reboldi, Giuseppe Mancina, Giuseppe Remuzzi, Henry Black, Hiromi Rakugi, Hiromichi Suzuki, Hiroshi Ogawa, Jamie Dwyer, Jan Lanke, Jan A Staessen, Jeffrey Cutler, Joachim Schrader, John Kostis, John Chalmers, Julia B Lewis, Kenji Ueshima, Kim Fox, Kizuku Kuramoto, Kristian Wachtell, Larry Agodoa, Lars H Lindholm, Lindon Wing, Lutgarde Thijs, Marc Allan Pfeffer, Maria H Mehlum, Mark Woodward, Masao Ishii, Masunori Matsuzaki, Michel Lievre, Morris Brown, Neil R Poulter, Nigel S Beckett, Paolo Verdecchia, Paul Helton, Peter Sever, Peter Sleight, Piero Ruggenenti, Ray Estacio, Richard B Devereaux, Robert Fagard, Robert Schrier, Robert P Byington, Rury R Holman, Salim Yusuf, Seiji Umemoto, Stephan Lueders, Stephen MacMahon, Steven Nissen, Stevo Julius, Sverre E Kjeldsen, Takao Saruta, Takayoshi Ohkubo, Toshio Ogihara, Tsuguya Fukui, Wiek H van Gilst, William C Cushman, Yoshihiko Kanno, Yoshiki Yui, Yutaka Imai, Zhen-Yu Zhang

*Other members:* Craig Anderson, Colin Baigent, Barry Morton Brenner, Rory Collins, Dick de Zeeuw, Jacobus Lubsen, Ettore Malacco, Bruce Neal, Vlado Perkovic, Anthony Rodgers, Peter Rothwell, Gholamreza Salimi-Khorshidi, Johan Sundström, Fiona Turnbull, Giancarlo Viberti, Jiguang Wang

## Contents

|                                                                                                                                                                                                                                                                                     |    |
|-------------------------------------------------------------------------------------------------------------------------------------------------------------------------------------------------------------------------------------------------------------------------------------|----|
| Method S1. Mendelian randomisation of blood pressure lowering per se on risk of diabetes .....                                                                                                                                                                                      | 5  |
| Method S2. Details of the International Consortium for Blood Pressure genome-wide association study.....                                                                                                                                                                            | 6  |
| Method S3. Details of statistical methods and sensitivity analyses for Mendelian randomisation study.....                                                                                                                                                                           | 7  |
| Method S4. The genetic approaches used to replicate the effect of each antihypertensive drug class using genetic analysis. ....                                                                                                                                                     | 10 |
| Table S1. Selected published reports on the effect of blood pressure lowering per se and specific drug class effect on risk of new-onset type 2 diabetes. ....                                                                                                                      | 13 |
| Table S2. Diagnostic criteria for the definition of type 2 diabetes in each trial. ....                                                                                                                                                                                             | 15 |
| Table S3. General characteristics of trials included in the individual patient data meta-analysis as well as Bayesian network meta-analysis. ....                                                                                                                                   | 16 |
| Table S4. Genetic variants selected as an instrumental variable for systolic blood pressure .....                                                                                                                                                                                   | 18 |
| Table S5. Post-hoc sensitivity analysis of the effect of systolic blood pressure lowering per se on the risk of new-onset type 2 diabetes, stratified by different diabetes ascertainment methods reported by each trial. ....                                                      | 28 |
| Table S6. Post-hoc one-stage Cox proportional hazards model included random effects terms and adjusted for multiple potential confounders.....                                                                                                                                      | 30 |
| Table S7. Structure of data used for Bayesian network meta-analysis. ....                                                                                                                                                                                                           | 31 |
| Figure S1. Trial selection flowchart.....                                                                                                                                                                                                                                           | 32 |
| Figure S2. The genetic variant selection workflow for systolic blood pressure.....                                                                                                                                                                                                  | 33 |
| Figure S3. Forest plot showing the effect of systolic blood pressure lowering per se on the risk of new-onset type 2 diabetes, overall and separately for each trial. ....                                                                                                          | 34 |
| Figure S4. Funnel plot for assessment of publication (acquisition) bias on the effect of blood pressure reduction and risk of new-onset type 2 diabetes. ....                                                                                                                       | 35 |
| Figure S5. Absolute risk reduction for the effect of each major antihypertensive drug class on the risk of new-onset type 2 diabetes. ....                                                                                                                                          | 36 |
| Figure S6. Effect of systolic blood pressure lowering per se on the risk of new-onset type 2 diabetes. ....                                                                                                                                                                         | 37 |
| Figure S7. Mendelian randomisation estimates for the association between genetically predicted 5-mmHg systolic blood pressure reduction and diabetes as the main outcome, and coronary heart disease, myocardial infarction, and ischemic stroke as positive control outcomes. .... | 38 |
| Figure S8. Scatter plot of genetic variant-outcome associations versus variant-exposure associations for the association between systolic blood pressure and risk of type 2 diabetes. ...                                                                                           | 39 |
| Figure S9. Funnel plot of variants, showing each variant causal estimate against instrument strength.....                                                                                                                                                                           | 40 |

|                                                                                                                                                                                                                                                                                                                         |    |
|-------------------------------------------------------------------------------------------------------------------------------------------------------------------------------------------------------------------------------------------------------------------------------------------------------------------------|----|
| Figure S10. The association between systolic blood pressure and risk of diabetes estimated by random-effect inverse variance weighted and applied various sensitivity analysis methods of two-sample Mendelian randomisation, before (main analysis) and after excluding outlier variants (sensitivity analysis). ..... | 41 |
| Figure S11. Leave-one-out plot to assess if a single variant is driving the association between systolic blood pressure and diabetes.....                                                                                                                                                                               | 42 |
| Figure S12. Multivariable Mendelian randomisation results unadjusted and adjusted for the anthropometric measures to check the possibility of collider bias in association between systolic blood pressure and diabetes. ....                                                                                           | 43 |
| Figure S13. Sensitivity analysis to assess the impact of using overlap dataset for the discovery of candidate instrumental variable for exposure. ....                                                                                                                                                                  | 44 |
| Figure S14. The association between systolic blood pressure and risk of diabetes replicated by one-sample Mendelian randomisation.....                                                                                                                                                                                  | 45 |
| Figure S15. Association of genetically influenced systolic blood pressure reduction overall and for each major class of antihypertensive medications, with type 2 diabetes as the main outcome, and coronary heart disease as the positive control. ....                                                                | 46 |
| References .....                                                                                                                                                                                                                                                                                                        | 48 |

#### Method S1. Mendelian randomisation of blood pressure lowering per se on risk of diabetes.

For this complementary analysis, the exposure was genetically-influenced systolic blood pressure used as an instrumental variable which was estimated using genetic variants with minor allele frequency  $>0.01$  that were independently (linkage disequilibrium  $r^2 < 0.05$ ) associated with systolic blood pressure at a genome-wide significance level ( $P < 5 \times 10^{-8}$ ). Overall, 246 genetic variants were selected from a genome-wide association studies (GWAS) meta-analysis, including over one million participants of European ancestry (**Table S4 and Figure S2**).<sup>1</sup> Because of the overlap between the GWAS selected for exposure and outcome (UK Biobank contributing to both),<sup>1,2</sup> and to avoid weak instrument bias,<sup>3</sup> we extracted the corresponding beta coefficients and standard errors from the International Consortium for Blood Pressure GWAS (ICBP), which did not include the UK Biobank<sup>4</sup> (**Method S2**). The summary statistics for variants associated with type 2 diabetes were extracted from the GWAS, including 21,147 type 2 diabetes cases and 434,460 controls from the European subset of UK Biobank participants.<sup>2</sup> In this GWAS study, type 2 diabetes outcomes were defined using UK Biobank self-reports of the disease and ICD-10 diagnostic codes, and analysis was controlled for age and sex, population stratification, relatedness, and polygenic effect.<sup>2</sup> We used a two-sample Mendelian randomisation framework to estimate the effect using a random-effect inverse variance weighted method and applied several sensitivity and positive control analyses (**Method S3**).

## Method S2. Details of the International Consortium for Blood Pressure genome-wide association study

To assess the causal association between blood pressure and risk of type 2 diabetes, we applied a two-sample Mendelian randomisation framework, in which the summary statistics from the International Consortium for Blood Pressure genome-wide association study (ICBP GWAS) were used for the analysis. ICBP is a genome-wide association meta-analysis, including about 200,000 participants from European countries, and its estimations were adjusted for sex, age, age-squared, body-mass index, within-cohort stratification, and also for blood pressure-lowering medication use.<sup>4</sup> The ICBP analyses were conducted using linear regression model and combined across studies using inverse-variance weighted meta-analysis.<sup>4</sup>

### *Two Sample Mendelian randomisation*

The summary estimations of variants-exposure and variants-outcome were harmonised before conducting the statistical analysis.<sup>3,5</sup> The inverse-variance weighted method has been used as the main method and assumes that either all the instruments are valid or any horizontal pleiotropy is balanced.<sup>6</sup> We applied various Mendelian randomisation methods with different assumptions as sensitivity analyses to check the robustness and reliability of our findings:

We employed the weighted median method<sup>7</sup>, which is consistent if at least 50% of the weight comes from valid instrumental variables.<sup>8</sup> The Mendelian Randomisation Pleiotropy RESidual Sum and Outlier (MR-PRESSO) method was used to test and, if needed, to correct for any possible horizontal pleiotropic outliers in the analysis.<sup>9</sup> The MR-Egger regression method was used to assess the presence of pleiotropy.<sup>10</sup> Although MR-Egger method is a worthwhile sensitivity analysis for detecting pleiotropy, it is susceptible to outlier genetic variants.<sup>11</sup> Therefore, we calculated Cook's distance measure<sup>11,12</sup> to detect the outlier variants, and then re-ran the MR-Egger analysis after removing the outlier variants. Robust Adjusted Profile Score (RAPS) estimator is robust to systematic and idiosyncratic pleiotropy and is recommended for complex traits and diseases.<sup>13</sup> MRMix method provides unbiased estimation in the presence of a large number of invalid genetic instruments. A methodological study suggested that MRMix produces more robust estimation compared to other conventional approaches.<sup>14</sup> Finally, we used Steiger filtering to remove genetic variants that are likely associated with diabetes through other causal pathways other than blood pressure.<sup>15</sup> We examined the heterogeneity of the estimates by using a scatter plot and applying Cochran's Q test.<sup>16</sup> We also assessed the probable directional pleiotropy using a funnel plot similar to that being used to assess for publication bias in meta-analysis.<sup>16</sup> A leave-one-out sensitivity analysis was conducted by removing a single variant from the analysis in turn. The fluctuation of the estimates in response to excluding each variant reflects the possibility of an outlier variant in the causal estimation. The 'MendelianRandomization' and 'TwoSampleMR' packages for R were used to implement the Mendelian randomisation analyses.<sup>17,18</sup>

The genome-wide association studies with blood pressure as phenotype routinely adjust for the effect of body mass index.<sup>1,4</sup> Using the estimates from body mass index-adjusted genome-wide association studies to conduct Mendelian randomisation could introduce collider bias. Therefore, we explored whether the identified causal association is driven by body mass index using unadjusted blood pressure estimations and by including body mass index as a phenotype in multivariable Mendelian randomisation. The UK Biobank dataset was used to derive the unadjusted estimates.<sup>19</sup> We used multivariable Mendelian randomisation



through the inverse-variance weighted method<sup>20,21</sup> to calculate adjusted versus unadjusted causal estimations.

Additionally, we tested the validity of the analysis by examining the effect between systolic blood pressure and coronary heart disease, myocardial infarction, and ischemic stroke as positive control outcomes. For this analysis, we utilised the same genetic variants for systolic blood pressure, but the variants-outcome association was extracted from independent genome-wide association studies.<sup>22,23</sup>

In a sensitivity analysis to further replicate the findings using different genome-wide association data, we extracted variants-outcome estimations from stage 1 of the DIAbetes Genetics Replication And Meta-analysis (DIAGRAM) Consortium.<sup>24</sup> The stage 1 of DIAGRAM consisted of 12,171 diabetes cases and 56,862 controls across 12 genome-wide association studies of individuals of European descent. In DIAGRAM, each genetic variant with a minor allele frequency of >1% passing quality control was tested for association with diabetes under an additive model.

#### *One-sample Mendelian randomisation*

To further replicate the result of two-sample Mendelian randomisation through a different framework, we followed a one-sample Mendelian randomisation approach using individual participant data from the UK Biobank. We used the UK Biobank data, which is a large prospective cohort study that included 502,602 participants aged 40 to 69 years, recruited between 2006 and 2010 from 22 assessment centres across the United Kingdom. Details of the UK Biobank design have been published elsewhere.<sup>25,26</sup> UK Biobank genotype data were imputed with IMPUTE4 using the Haplotype Reference Consortium and the UK10K + 1000 Genomes panel<sup>27</sup> to identify ~96 million variants for 487,381 participants. We excluded 55,208 individuals who were not white British, had a variant call rate <98% and were outliers based on heterozygosity. Finally, we included 432,173 participants in the one-sample Mendelian randomisation study. We built a weighted polygenic risk score as an instrumental variable for systolic blood pressure using independent genetic variants (linkage disequilibrium  $r^2 < 0.05$ ) with minor allele frequency > 0.01 and  $P < 5 \times 10^{-8}$  at a genome-wide level. Overall, 246 genetic variants were selected, all with imputation quality > 0.9 that have been shown to be associated with systolic blood pressure in a genome-wide association meta-analysis, including over one million participants of European ancestry.<sup>1</sup> To build a genetic risk score, first, each variant was recoded additively (0, 1, and 2) according to the number of alleles that decrease the log beta of systolic blood pressure. Then, each variant was weighed according to the regression coefficient obtained from the genome-wide association meta-analysis to give more weight to variants with stronger effects.<sup>28</sup> A weighted genetic risk score was constructed using the following formula:

$(\beta_1 \times \text{variant}_1) + (\beta_2 \times \text{variant}_2) + \dots + (\beta_n \times \text{variant}_n)$ , where  $\beta_i$  was the regression coefficient associated with variant<sub>i</sub> and obtained from the genome-wide association study. Additionally, we replicated the one-sample Mendelian randomisation in another sensitivity analysis. In this sensitivity analysis, to build a new genetic

risk score, we selected 370 genetic variants that have been reported to be associated with systolic blood pressure (linkage disequilibrium  $r^2 < 0.05$ , minor allele frequency  $> 0.01$  and  $P < 5 \times 10^{-8}$  at a genome-wide level which passed quality control) in the final ICBP genome-wide association dataset included 77 cohorts ( $n = 299,024$ , no overlap with UK Biobank). The instrumental variable analysis was performed using an adjusted, two-stage predictor substitution method that used the unweighted genetic risk score as an instrument variable.

Method S4. The genetic approaches used to replicate the effect of each antihypertensive drug class using genetic analysis.

Blood pressure-lowering drug class effects can be predicted through variants in genes that encode receptors related to their mechanism of action. By way of example, beta-blockers, as a sympatholytic class of drugs, work by inhibiting the activation of the beta-adrenergic receptors with adrenaline and noradrenaline, thereby, reducing heart rate, myocardial contractility, and cardiac output.<sup>29</sup> In the same way, ADRB1 is a gene that encodes the beta-1 adrenergic receptor present in cardiomyocytes and in the heart conduction system, which plays a role in heart rate and myocardial contractility. Therefore, genetic variants in the ADRB1 gene associated with systolic blood pressure can be used as a proxy for treatment effect for beta-blockers and thus help assess the effect of that drug class on the outcome of interest.<sup>30</sup> For this complementary analysis, the genetic variants suggested by Gill et al.,<sup>31</sup> and Walker et al.,<sup>32</sup> were considered to estimate the effect of the blood pressure-lowering drug classes. Further details on the selection of the candidate genetic variants for each class of drugs are described in the below section. Two-sample Mendelian randomisation, through the random-effect inverse-variance weighted approach, was used for statistical analysis. We used coronary heart disease as a positive control to compare the estimates with an outcome in which there is well-established evidence from RCTs, particularly for the effect of each class of antihypertensive.<sup>33</sup> The same GWAS studies described earlier were also utilized for this stage of the analysis.<sup>2,4</sup>

We were interested in selecting the approach that has a high statistical power and provides precise estimation for each drug class. The following steps were taken for selection:

- a) For validation purposes and as a positive control outcome, we considered coronary heart disease (CHD) as the outcome of interest throughout this analysis because there is strong evidence for the protective effect of major classes of antihypertensives on the risk of CHD.<sup>34–36</sup>
- b) The effect of each class of antihypertensive drug was assessed first using the placebo-controlled trials to provide trial-based estimation for the effect of each class versus placebo and then using Mendelian randomisation analysis through genetic variants reported by Gill et al.<sup>37</sup> and Walker et al.<sup>38</sup>, separately.
- c) For each class of drug, we selected the better performing approach (Gill or Walker method) if the estimated effect size met the two predefined criteria: 1) the effect size (point estimation) should be in the same direction as the estimation from placebo-controlled trials; 2) the estimates to have higher precision (narrower confidence intervals).
- d) **Nested Figure i** shows the final selection. We selected the genetic variants for ACEIs/ARBs and thiazide diuretic from the Walker et al.<sup>38</sup> and beta-blockers and calcium channel blockers from the Gill et al.<sup>37</sup> The characteristics of genetic variants selected for each class of drugs are shown in the **Nested Table ii**.

**Nested Figure i.** Comparison of the effect of major antihypertensive drug classes on coronary heart disease as positive control outcome, using individual participant data meta-analysis of randomised placebo-controlled clinical trials and Mendelian randomisation

Blue squares represent the point estimation and size of squares is the same. The horizontal solid lines represent 95% confidence intervals. RR indicate hazard ratio in individual participant data meta-analysis and odds ratio in Mendelian randomisation; ACEIs/ARBs: angiotensin-converting enzyme inhibitors/angiotensin II receptor blockers

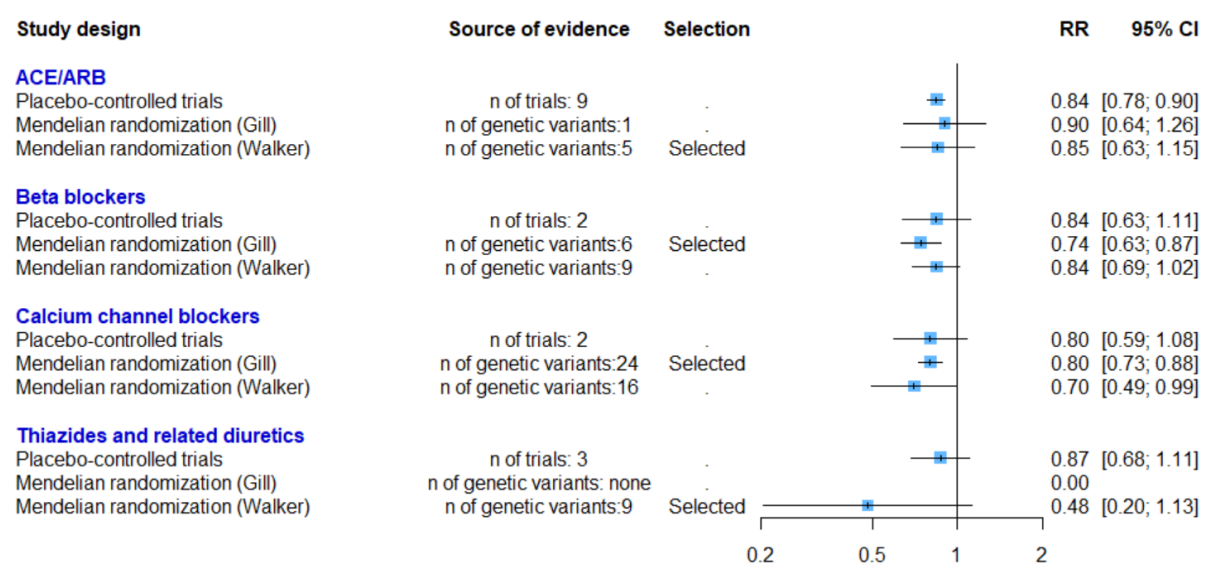

**Nested Table ii.** The characteristics of genetic variants selected to assess the effect of major antihypertensive drug classes on the risk of new-onset type 2 diabetes, using Mendelian randomisation approach.

| ACEIs/ARBs               |             |         |         |        |         |        |          |                   |
|--------------------------|-------------|---------|---------|--------|---------|--------|----------|-------------------|
| Chromosome (GRCh37)      | SNP         | allele1 | allele2 | freq1  | Effect  | SE     | p-value  | Total sample size |
| 3:148913426              | rs118123032 | t       | c       | 0.0332 | -0.153  | 0.1381 | 0.2677   | 273115            |
| 3:149370293              | rs79387447  | a       | g       | 0.0145 | 0.0148  | 0.2263 | 0.9477   | 273295            |
| 3:148485148              | rs80350379  | t       | c       | 0.0207 | 0.0982  | 0.1937 | 0.6121   | 272143            |
| 3:11652673               | rs9829399   | t       | c       | 0.1172 | 0.1489  | 0.0716 | 0.03745  | 278480            |
| 17:61550729              | rs4968783   | a       | c       | 0.6091 | -0.2927 | 0.0472 | 5.54E-10 | 285133            |
| Beta-blockers            |             |         |         |        |         |        |          |                   |
| 10:115707298             | rs11196549  | a       | g       | 0.0421 | 0.7923  | 0.1255 | 2.75E-10 | 279594            |
| 10:115721364             | rs460718    | a       | g       | 0.3222 | -0.1832 | 0.0497 | 0.000226 | 279594            |
| 10:115788094             | rs11196597  | a       | g       | 0.1379 | 0.2439  | 0.0716 | 0.000664 | 278589            |
| 10:115800294             | rs17875473  | t       | c       | 0.0944 | 0.2345  | 0.0844 | 0.005472 | 279595            |
| 10:115805056             | rs1801253   | c       | g       | 0.7305 | 0.4394  | 0.0524 | 5.08E-17 | 279594            |
| 10:115826508             | rs4359161   | a       | g       | 0.1822 | -0.2376 | 0.0592 | 6.09E-05 | 279593            |
| Calcium channel blockers |             |         |         |        |         |        |          |                   |
| 12:2434419               | rs2239046   | a       | g       | 0.6788 | 0.2237  | 0.0483 | 3.61E-06 | 287243            |
| 12:2514270               | rs714277    | t       | c       | 0.2837 | 0.2199  | 0.0503 | 1.24E-05 | 287245            |
| 10:18334521              | rs2488136   | a       | g       | 0.2803 | 0.1453  | 0.0513 | 0.004658 | 279594            |
| 10:18440444              | rs1888693   | a       | g       | 0.3472 | 0.3351  | 0.0482 | 3.57E-12 | 277475            |
| 10:18457722              | rs16916914  | t       | c       | 0.9604 | -0.4955 | 0.1192 | 3.22E-05 | 278849            |
| 10:18459450              | rs7076319   | a       | g       | 0.7277 | -0.2133 | 0.0516 | 3.56E-05 | 278479            |

|                    |             |   |   |        |         |        |          |        |
|--------------------|-------------|---|---|--------|---------|--------|----------|--------|
| 10:18481737        | rs61278674  | a | g | 0.911  | -0.1719 | 0.0865 | 0.0469   | 278588 |
| 10:18514561        | rs1779209   | t | c | 0.296  | 0.1356  | 0.0514 | 0.00836  | 270873 |
| 10:18553968        | rs10828399  | a | g | 0.5323 | -0.1507 | 0.0459 | 0.001027 | 279593 |
| 10:18592450        | rs10828452  | a | t | 0.7949 | 0.2464  | 0.061  | 5.32E-05 | 278589 |
| 10:18627285        | rs10828542  | a | g | 0.6157 | 0.143   | 0.0475 | 0.002622 | 279595 |
| 10:18678987        | rs12780039  | c | g | 0.1201 | 0.1752  | 0.072  | 0.01497  | 279592 |
| 10:18695681        | rs112133583 | t | c | 0.0266 | -0.4123 | 0.1724 | 0.0168   | 278594 |
| 10:18710991        | rs11014170  | a | g | 0.0234 | -0.6098 | 0.1781 | 0.000618 | 273573 |
| 10:18727901        | rs7923191   | a | g | 0.7884 | -0.3403 | 0.0572 | 2.64E-09 | 278479 |
| 10:18727959        | rs12258967  | c | g | 0.7104 | 0.5426  | 0.0529 | 1.06E-24 | 278590 |
| 10:18729855        | rs72786098  | a | g | 0.0291 | -0.3976 | 0.1472 | 0.006913 | 278480 |
| 10:18755664        | rs1998822   | a | g | 0.7272 | -0.1349 | 0.0529 | 0.01072  | 268756 |
| 10:18790727        | rs4748474   | a | g | 0.5273 | 0.1149  | 0.0467 | 0.0138   | 271333 |
| 12:49209340        | rs150857355 | c | g | 0.0213 | 1.0616  | 0.1906 | 2.56E-08 | 272725 |
| 3:53558012         | rs3821843   | a | g | 0.6838 | 0.331   | 0.0524 | 2.61E-10 | 277474 |
| 3:53605712         | rs114987861 | a | g | 0.0305 | 0.395   | 0.1472 | 0.007298 | 278479 |
| 3:53612327         | rs113210396 | t | g | 0.0445 | -0.3563 | 0.1293 | 0.005856 | 278589 |
| 3:53734443         | rs7340705   | t | c | 0.6684 | -0.1929 | 0.0485 | 7.08E-05 | 279594 |
| Thiazide diuretics |             |   |   |        |         |        |          |        |
| 10:78695467        | rs10762738  | a | g | 0.5005 | 0.0565  | 0.0469 | 0.2278   | 261609 |
| 15:26818362        | rs8030011   | a | g | 0.1342 | 0.0187  | 0.0665 | 0.779    | 287242 |
| 15:27722954        | rs140443467 | a | g | 0.9691 | -0.0779 | 0.1645 | 0.6357   | 269648 |
| 15:47906718        | rs12914000  | t | c | 0.8366 | 0.0882  | 0.0636 | 0.1658   | 286240 |
| 4:45844166         | rs139787011 | a | g | 0.9834 | 0.1814  | 0.2274 | 0.425    | 257608 |
| 4:45956676         | rs7699135   | t | c | 0.8659 | -0.0591 | 0.0684 | 0.3876   | 279594 |
| 5:160335398        | rs13188637  | a | g | 0.5052 | -0.0181 | 0.0461 | 0.694    | 276577 |
| 5:161908897        | rs10076365  | a | g | 0.8301 | -0.0443 | 0.0616 | 0.4717   | 275462 |
| 8:87064009         | rs62509890  | a | g | 0.8927 | -0.134  | 0.0757 | 0.07688  | 279595 |

Supplementary Tables

Table S1. Selected published reports on the effect of blood pressure lowering per se and specific drug class effect on risk of new-onset type 2 diabetes.

| Study                                                                                                | Publication date | Design                                                                   | Study name                                              | Size                                                                                                                         | Time of follow-up               | Exposure in cohort studies or trial arms in RCTs                        | Finding                                                                                                                                                                                                                                                                                                                                                                                                                                                                                                                                                                                 | Conclusion                                                                                                              | Comment                                                                                                                                                                                                                                                                                                                                                         |
|------------------------------------------------------------------------------------------------------|------------------|--------------------------------------------------------------------------|---------------------------------------------------------|------------------------------------------------------------------------------------------------------------------------------|---------------------------------|-------------------------------------------------------------------------|-----------------------------------------------------------------------------------------------------------------------------------------------------------------------------------------------------------------------------------------------------------------------------------------------------------------------------------------------------------------------------------------------------------------------------------------------------------------------------------------------------------------------------------------------------------------------------------------|-------------------------------------------------------------------------------------------------------------------------|-----------------------------------------------------------------------------------------------------------------------------------------------------------------------------------------------------------------------------------------------------------------------------------------------------------------------------------------------------------------|
| <b>Studies investigating the effect of blood pressure lowering per se on risk of type 2 diabetes</b> |                  |                                                                          |                                                         |                                                                                                                              |                                 |                                                                         |                                                                                                                                                                                                                                                                                                                                                                                                                                                                                                                                                                                         |                                                                                                                         |                                                                                                                                                                                                                                                                                                                                                                 |
| <b>1) Meta-analysis of observational studies</b>                                                     |                  |                                                                          |                                                         |                                                                                                                              |                                 |                                                                         |                                                                                                                                                                                                                                                                                                                                                                                                                                                                                                                                                                                         |                                                                                                                         |                                                                                                                                                                                                                                                                                                                                                                 |
| Emdin CA <sup>39</sup>                                                                               | 2015             | -Observational cohort<br>- Meta-analysis of observational cohort studies | Clinical Practice Research Datalink (CPRD)              | Observational cohort: 4.1 million<br>Meta-analysis: 30 studies with 285,664 participants and 17,388 incident diabetes events | A median follow-up of 6.8 years | Systolic BP per 20 mmHg increase                                        | <b>Observational cohort:</b> 20 mmHg higher systolic BP was associated with a 58% higher risk of new-onset diabetes (hazard ratio 1.58; 95% CI 1.56 to 1.59)<br><b>Meta-analysis:</b> The pooled relative risk of diabetes for a 20 mmHg higher usual systolic BP across studies was 1.77 (1.53 to 2.05).                                                                                                                                                                                                                                                                               | Elevated BP was associated with an increased risk of new-onset diabetes.                                                | - The largest ever observational analysis<br>- Observational study could not confirm the causal association                                                                                                                                                                                                                                                     |
| <b>1) Individual randomised controlled trial</b>                                                     |                  |                                                                          |                                                         |                                                                                                                              |                                 |                                                                         |                                                                                                                                                                                                                                                                                                                                                                                                                                                                                                                                                                                         |                                                                                                                         |                                                                                                                                                                                                                                                                                                                                                                 |
| Roumie CL <sup>40</sup>                                                                              | 2020             | Randomised clinical trial                                                | The Systolic Blood Pressure Intervention Trial (SPRINT) | 8,380                                                                                                                        | 3 years                         | More intense vs less intense treatment                                  | Adjusted hazard ratio for incidence of diabetes was 1.19 (95% CI, 0.95–1.49)                                                                                                                                                                                                                                                                                                                                                                                                                                                                                                            | No clear effect on risk of diabetes.                                                                                    | - Short length of follow up and not placebo-controlled<br>- Information about the combination of antihypertensive drugs used in each arm was limited, and hence the study was unable to separate the effects of BP reduction from varying drug classes off-target effect                                                                                        |
| <b>2) Mendelian randomisation</b>                                                                    |                  |                                                                          |                                                         |                                                                                                                              |                                 |                                                                         |                                                                                                                                                                                                                                                                                                                                                                                                                                                                                                                                                                                         |                                                                                                                         |                                                                                                                                                                                                                                                                                                                                                                 |
| Sun D <sup>41</sup>                                                                                  | 2019             | Mendelian randomisation                                                  | UK Biobank                                              | 318,664                                                                                                                      | NA                              | Genetically determined hypertension                                     | Genetically determined hypertension has no relationship with diabetes (odds ratio 0.96 [CI 95% 0.88 to 1.04])                                                                                                                                                                                                                                                                                                                                                                                                                                                                           | No causal association                                                                                                   | The lack of association in this study may be due to weak instrument bias because summary estimations for variants-exposure and variants-outcome were derived from the same population (i.e., UK biobank). Also, categorizing a continuous variable such as blood pressure to binary hypertension reduces the statistical power to detect any causal association |
| Aikens RC <sup>42</sup>                                                                              | 2017             | Mendelian randomisation                                                  | NA                                                      | Summary statistics from GWAS meta-analysis                                                                                   | NA                              | Genetically determined higher systolic BP                               | 2% increase in the risk of diabetes per 1 mmHg genetically determined higher systolic BP (odds ratio 1.02, 95% CI 1.01 to 1.03)                                                                                                                                                                                                                                                                                                                                                                                                                                                         | Elevated systolic BP was associated with an increased risk of diabetes                                                  | This study was based on only 28 genetic variants associated with systolic BP, however the findings are broadly consistent with our result                                                                                                                                                                                                                       |
| Zhu Z <sup>43</sup>                                                                                  | 2018             | Mendelian randomisation                                                  | NA                                                      | Summary statistics from GWAS meta-analysis                                                                                   | NA                              | Genetically determined higher systolic BP                               | - Analysis based on GWAS meta-analysis of two community-based studies (GERA and UKB) showed no association (odds ratio 1.07, 95% CI 0.89 to 1.29)<br>- Analysis based on published independent case-control studies revealed significant finding (odds ratio 1.46, 95% CI 0.13 to 1.89)                                                                                                                                                                                                                                                                                                 | Inconsistent findings based on different dataset                                                                        | Given the small number of instruments used, the analysis likely to be limited in statistical power                                                                                                                                                                                                                                                              |
| <b>Studies investigating the effect of antihypertensives on risk of type 2 diabetes</b>              |                  |                                                                          |                                                         |                                                                                                                              |                                 |                                                                         |                                                                                                                                                                                                                                                                                                                                                                                                                                                                                                                                                                                         |                                                                                                                         |                                                                                                                                                                                                                                                                                                                                                                 |
| <b>1) Observational studies</b>                                                                      |                  |                                                                          |                                                         |                                                                                                                              |                                 |                                                                         |                                                                                                                                                                                                                                                                                                                                                                                                                                                                                                                                                                                         |                                                                                                                         |                                                                                                                                                                                                                                                                                                                                                                 |
| Gress TW <sup>44</sup>                                                                               | 2000             | Prospective cohort study                                                 | The Atherosclerosis Risk in Communities (ARIC)          | 12,550                                                                                                                       | 6 years                         | Antihypertensive medications use in people without diabetes at baseline | - Thiazide diuretics were not significantly associated with greater risk of the subsequent development of diabetes (hazard ratio, 0.91; 95% CI, 0.73 to 1.13)<br>- ACEI were significantly not associated with greater risk of the subsequent development of diabetes (hazard ratio, 0.98; 95% CI, 0.72–1.34)<br>- Calcium channel blockers were not associated with a significantly greater risk of the subsequent development of diabetes hazard ratio 1.17, 95% CI 0.83 to 1.66)<br>- Beta-blocker increased the risk of new-onset diabetes (hazard ratio 1.28, 95% CI 1.04 to 1.57) | Beta-blockers were associated with an increased risk of diabetes, but for other classes no significant effect was found | Observational studies are prone to confounding and reverse causation and cannot confirm the effect of drug classes                                                                                                                                                                                                                                              |
| <b>2) Individual randomised controlled trial</b>                                                     |                  |                                                                          |                                                         |                                                                                                                              |                                 |                                                                         |                                                                                                                                                                                                                                                                                                                                                                                                                                                                                                                                                                                         |                                                                                                                         |                                                                                                                                                                                                                                                                                                                                                                 |
| Fletcher AE <sup>45</sup>                                                                            | 1991             | Randomised clinical trial                                                | The European Working Party on High Blood Pressure       | 840                                                                                                                          | NA                              | Diuretics vs placebo                                                    | No significant effect on new-onset diabetes participant (risk ratio 1.47, 95% CI 0.84 to 1.57)                                                                                                                                                                                                                                                                                                                                                                                                                                                                                          | BP lowering treatment with diuretics had no significant effect on the incidence of                                      | The sample size and number of events were comparatively small                                                                                                                                                                                                                                                                                                   |

|                                                                                                                                                                                                                               |      |                                                                                        | in the Elderly<br>(EWPHE)                                        |                                        |           |                                                      |                                                                                                                                                                                                                                                                                     | diabetes in elderly<br>hypertensive patients                                                                                                                                                                                                                    |                                                                                                                                                                                                                                                                                                                                                                                                                                                                                                                               |
|-------------------------------------------------------------------------------------------------------------------------------------------------------------------------------------------------------------------------------|------|----------------------------------------------------------------------------------------|------------------------------------------------------------------|----------------------------------------|-----------|------------------------------------------------------|-------------------------------------------------------------------------------------------------------------------------------------------------------------------------------------------------------------------------------------------------------------------------------------|-----------------------------------------------------------------------------------------------------------------------------------------------------------------------------------------------------------------------------------------------------------------|-------------------------------------------------------------------------------------------------------------------------------------------------------------------------------------------------------------------------------------------------------------------------------------------------------------------------------------------------------------------------------------------------------------------------------------------------------------------------------------------------------------------------------|
| Savage PJ <sup>46</sup>                                                                                                                                                                                                       | 1998 | Multicenter,<br>randomised, double-<br>blind, placebo-<br>controlled clinical<br>trial | The Systolic<br>Hypertension in the<br>Elderly Program<br>(SHEP) | 4,736                                  | 3 years   | Thiazide diuretic or<br>beta blockers vs<br>placebo  | New cases of diabetes were reported by 8.6% of the<br>participants in the active treatment group and 7.5%<br>of the participants in the placebo group (risk ratio<br>1.14, 95% CI 0.90 to 1.45)                                                                                     | No significant increase in risk<br>of diabetes                                                                                                                                                                                                                  | The sample size and number of events were<br>comparatively small                                                                                                                                                                                                                                                                                                                                                                                                                                                              |
| Cooper-<br>DeHoff R <sup>47</sup>                                                                                                                                                                                             | 2006 | Randomised clinical<br>trial                                                           | International<br>Verapamil SR-<br>Trandolapril Study<br>(INVEST) | 16,176                                 | 2.8 years | Calcium channel<br>blockers versus beta-<br>blockers | Risk of new-onset diabetes was lower in patients<br>who took calcium channel blockers than beta-<br>blocker (hazard ratio 0.85, 95% CI 0.76 to 0.95).                                                                                                                               | Beta-blockers compared with<br>calcium channel blockers<br>increased the risk of diabetes                                                                                                                                                                       | Given the number of diabetes events (25 cases in<br>calcium channel blockers and 30 cases in beta-<br>blockers groups), the findings were not robust. No<br>insights on drug vs placebo effects.                                                                                                                                                                                                                                                                                                                              |
| <b>3) Meta-analyses of trials</b>                                                                                                                                                                                             |      |                                                                                        |                                                                  |                                        |           |                                                      |                                                                                                                                                                                                                                                                                     |                                                                                                                                                                                                                                                                 |                                                                                                                                                                                                                                                                                                                                                                                                                                                                                                                               |
| Elliott WJ <sup>48</sup>                                                                                                                                                                                                      | 2007 | Network meta-<br>analysis of clinical<br>trials                                        | NA                                                               | 22 trials with 143,153<br>participants | NA        | Antihypertensive<br>agents                           | Considering the diuretics as the comparator group,<br>the odds ratios were: 0.57 (95% CI 0.46 to 0.72) for<br>ARB, 0.67 (0.56 to 0.80) for ACEI, 0.75 (0.62 to 0.90)<br>for Calcium channel blockers, 0.77 (0.63 to 0.94) for<br>placebo and 0.90 (0.75 to 1.09) for beta-blockers. | ARBs and ACEIs are least<br>associated with the risk of<br>new-onset diabetes, followed<br>by Calcium channel blockers,<br>placebo, beta-blockers, and<br>thiazide diuretic. All drug<br>classes appeared to have a<br>more favourable effect than<br>diuretics | Similar to our network meta-analysis, a high<br>proportion of evidence in this study was estimated<br>through indirect comparisons. With the main<br>comparisons being against diuretics (which are<br>unlikely to have a neutral effect on diabetes), the<br>interpretation and clinical implications have<br>remained elusive. A sensitivity analysis reported<br>effects against placebo but the confidence intervals<br>for some comparisons were wide, leading to<br>inconclusive estimates for ACEIs and beta-blockers. |
| <b>4) Mendelian randomisation</b>                                                                                                                                                                                             |      |                                                                                        |                                                                  |                                        |           |                                                      |                                                                                                                                                                                                                                                                                     |                                                                                                                                                                                                                                                                 |                                                                                                                                                                                                                                                                                                                                                                                                                                                                                                                               |
| <i>No study</i>                                                                                                                                                                                                               |      |                                                                                        |                                                                  |                                        |           |                                                      |                                                                                                                                                                                                                                                                                     |                                                                                                                                                                                                                                                                 |                                                                                                                                                                                                                                                                                                                                                                                                                                                                                                                               |
| BP: blood pressure, RCT: randomised controlled trial, CI: confidence intervals, GWAS: genome wide association study, ACEI: Angiotensin-converting-enzyme inhibitors, ARB: angiotensin II receptor blocker, NA: not applicable |      |                                                                                        |                                                                  |                                        |           |                                                      |                                                                                                                                                                                                                                                                                     |                                                                                                                                                                                                                                                                 |                                                                                                                                                                                                                                                                                                                                                                                                                                                                                                                               |

Table S2. Diagnostic criteria for the definition of type 2 diabetes in each trial.

| Trial name               | New-onset type 2 diabetes definition                                                                                                     | Treatment |       | Comparator |       |
|--------------------------|------------------------------------------------------------------------------------------------------------------------------------------|-----------|-------|------------|-------|
|                          |                                                                                                                                          | Events    | Total | Events     | Total |
| ACTIVE I <sup>49</sup>   | Adverse event report                                                                                                                     | 196       | 3614  | 213        | 3617  |
| ALLHAT <sup>50</sup>     | Fasting blood glucose of $\geq 7.0$ mmol/L (126 mg/dL)                                                                                   | 1374      | 9719  | 1810       | 17393 |
| ANBP <sup>51</sup>       | Adverse event report                                                                                                                     | 14        | 1717  | 13         | 1704  |
| ANBP2 <sup>52</sup>      | Adverse event report                                                                                                                     | 184       | 2817  | 127        | 2795  |
| ASCOT-BPLA <sup>53</sup> | Fasting blood glucose of $\geq 7.0$ mmol/L (126 mg/dL)                                                                                   | 565       | 7032  | 792        | 6982  |
| CAPPP <sup>54</sup>      | Two determinations of fasting blood glucose of $\geq 6.7$ mmol/L (120.6 mg/dL) according to the 1985 World Health Organization criteria. | 380       | 5205  | 337        | 5154  |
| CASEJ <sup>55</sup>      | Self-reported diabetes or anti-diabetic agents                                                                                           | 59        | 1293  | 38         | 1302  |
| COLM <sup>56</sup>       | Initial diagnosis by participating physicians and final ascertainment by the endpoint committee                                          | 15        | 1840  | 11         | 1844  |
| COPE <sup>57</sup>       | Adverse event report                                                                                                                     | 20        | 956   | 69         | 1871  |
| HIJ-CREATE <sup>58</sup> | Fasting blood glucose $\geq 7.0$ mmol/L (126 mg/dL) or commencement of anti-diabetic agents and/or glycohemoglobin A1c $\geq 6.5\%$      | 7         | 645   | 18         | 624   |
| HOPE <sup>59</sup>       | Adverse event report                                                                                                                     | 102       | 4645  | 155        | 4652  |
| INSIGHT <sup>60</sup>    | World Health Organization criteria                                                                                                       | 136       | 3154  | 176        | 3163  |
| MOSES <sup>61</sup>      | Adverse event report                                                                                                                     | 11        | 416   | 19         | 433   |
| NORDIL <sup>62</sup>     | Adverse event report                                                                                                                     | 249       | 5026  | 216        | 4980  |
| ONTARGET <sup>63</sup>   | Fasting blood glucose of $\geq 7.0$ mmol/L (126 mg/dL)                                                                                   | 323       | 5280  | 761        | 10717 |
| PEACE <sup>64</sup>      | Adverse event report                                                                                                                     | 334       | 3417  | 399        | 3457  |
| PROGRESS <sup>65</sup>   | Adverse event report                                                                                                                     | 80        | 2657  | 86         | 2685  |
| STOP2 <sup>66</sup>      | Two determinations of fasting blood glucose of $\geq 6.7$ mmol/L (120.6 mg/dL)                                                           | 97        | 1954  | 190        | 3923  |
| SYSTEUR <sup>67</sup>    | International Classification of Diseases, ninth revision                                                                                 | 107       | 2165  | 78         | 2069  |
| TRANSCEND <sup>68</sup>  | Fasting blood glucose of $\geq 7.0$ mmol/L (126 mg/dL)                                                                                   | 205       | 1889  | 238        | 1905  |
| VALUE <sup>69</sup>      | Fasting blood glucose of $> 7.8$ mmol/L (140.4 mg/dL)                                                                                    | 690       | 7649  | 845        | 7596  |
| PROFESS <sup>70</sup>    | Adverse event report                                                                                                                     | 112       | 7108  | 136        | 7103  |

ACTIVE I: Atrial Fibrillation Clopidogrel Trial with Irbesartan for Prevention of Vascular Events; ALLHAT: Antihypertensive and Lipid Lowering Treatment to Prevent Heart Attack Trial; ANBP: Australian National Blood Pressure Study; ANBP2: Second Australian National Blood Pressure Study; ASCOT-BPLA: Anglo-Scandinavian Cardiac Outcomes Trial-Blood Pressure Lowering Arm; CAPPP: Captopril Prevention Project; CASE-J: Candesartan Antihypertensive Survival Evaluation in Japan Trial; COLM: Combination of OLMesartan study; COPE: Combination Therapy of Hypertension to Prevent Cardiovascular Events; HIJ-CREATE: Heart Institute of Japan Candesartan Randomized Trial for Evaluation in Coronary Artery Disease; HOPE: Heart Outcomes Prevention Evaluation; INSIGHT: International Nifedipine GITS study; Intervention as a Goal in Hypertension Treatment; MOSES: Morbidity and Mortality After Stroke, Eprosartan Compared With Nitrendipine for Secondary Prevention; NORDIL: Nordic Diltiazem Study; ONTARGET: Ongoing Telmisartan Alone and in Combination with Ramipril Global Endpoint Trial; PEACE: Prevention of Events with Angiotensin-Converting Enzyme Inhibition; PROFESS: Prevention Regimen for Effectively Avoiding Second Strokes; PROGRESS: Perindopril Protection Against Recurrent Stroke Study; STOP Hypertension-2: Swedish Trial in Old Patients with Hypertension-2; Syst-Eur: Systolic Hypertension in Europe; TRANSCEND: Telmisartan Randomized Assessment Study in ACE Intolerant Subjects with Cardiovascular Disease; VALUE:Valsartan Antihypertensive Long-term Use Evaluation



Table S3. General characteristics of trials included in the individual patient data meta-analysis as well as Bayesian network meta-analysis.

| Trial name               | Design             | Inclusion criteria                                                                                                                                                                                                                                                                                                                | Exclusion criteria                                                                                                                                                                                                                                         | Follow-up duration (years) | Trial arms        |                                | Incident diabetes cases† | Total participants | Diabetes event date¶ |
|--------------------------|--------------------|-----------------------------------------------------------------------------------------------------------------------------------------------------------------------------------------------------------------------------------------------------------------------------------------------------------------------------------|------------------------------------------------------------------------------------------------------------------------------------------------------------------------------------------------------------------------------------------------------------|----------------------------|-------------------|--------------------------------|--------------------------|--------------------|----------------------|
|                          |                    |                                                                                                                                                                                                                                                                                                                                   |                                                                                                                                                                                                                                                            |                            | Intervention*     | Comparator                     |                          |                    |                      |
| ACTIVE I <sup>49</sup>   | Placebo-controlled | Atrial fibrillation, ≥1 risk factor (age ≥75 years, on antihypertensive treatment, history of stroke, TIA or non-CNS embolism, LVEF <45%, PVD, or age 55-74 years with either CAD or diabetes)                                                                                                                                    | Use of anticoagulant, peptic ulcer disease in past 6 months, history of intracerebral haemorrhage, thrombocytopenia, or mitral stenosis                                                                                                                    | 4.1                        | ARB               | Placebo                        | 409                      | 7,231              | Available            |
| ALLHAT <sup>35</sup>     | Head-to-head       | Age ≥55 years stage 1 or 2 hypertension plus ≥1 risk factor (MI or stroke >6 months previously, left ventricular hypertrophy, T2D, smoking, HDL <0.91 mmol/l), other atherosclerotic CVD                                                                                                                                          | Symptomatic or hospitalisation for heart failure, LVEF <35%                                                                                                                                                                                                | 4.8                        | Diuretic          | ACEI, CCB or alpha-blocker     | 3,184                    | 27,135             | Available            |
| ANBP <sup>51</sup>       | Placebo-controlled | Age 30-69 years with mild hypertension (DBP 95-110 mmHg and SBP <200 mmHg)                                                                                                                                                                                                                                                        | Antihypertensive treatment in the past 3 months, recent angina or MI, stroke, hormone therapy, asthma, diabetes, gout, severe disease, tricyclic antidepressant use                                                                                        | 3.6                        | Diuretic          | Placebo                        | 27                       | 3,427              | Available            |
| ANBP2 <sup>52</sup>      | Head-to-head       | Age 65-84 years, SBP ≥160 mmHg or DBP ≥90 mmHg (if SBP≥140 mmHg), no recent CVD                                                                                                                                                                                                                                                   | Serious illness, plasma creatinine >221 µmol/l, malignant hypertension, dementia                                                                                                                                                                           | 4.1                        | Diuretic          | ACEI                           | 341                      | 5,642              | Available            |
| ASCOT-BPLA <sup>71</sup> | Head-to-head       | Age 40-79 years, untreated (SBP ≥160 or DBP ≥100 mmHg) or treated hypertension (SBP ≥140 or DBP ≥90 mmHg), ≥3 CVD risk factors (documented LVH, abnormal ECG, T2D, PAD, previous stroke or TIA, male sex, age ≥55 years, microalbuminuria or proteinuria, smoking, TC: HDL ≥6, family history of premature coronary heart disease | Previous MI, current treatment for angina, recent CeVD, fasting triglycerides >4.5 mmol/l, heart failure, arrhythmia, haematological or biochemical abnormality at screening                                                                               | 5.3                        | CCB-based (+ACEI) | BB-based (+ diuretic)          | 1,358                    | 14,112             | Available            |
| CAPPP <sup>54</sup>      | Head-to-head       | Age 25-66 years, DBP ≥100 mmHg on two occasions                                                                                                                                                                                                                                                                                   | Secondary hypertension, serum creatinine >150 µmol/, a condition requiring BB treatment                                                                                                                                                                    | 5.8                        | BB and diuretic   | ACEI                           | 717                      | 10,413             | Available            |
| CASEJ <sup>55</sup>      | Head-to-head       | Age 20-85 years, ≥1 high-risk factor: SBP ≥180 or DBP ≥110 mmHg, T2D, history of angina pectoris, MI, stroke, TIA >6 months before screening, LVH, proteinuria or serum creatinine ≥1.3 mg/100 ml, peripheral artery obstruction                                                                                                  | BP ≥200/120 mmHg, T1D, heart failure, LVEF <40%, atrial fibrillation, cancer                                                                                                                                                                               | 3.1                        | CCB               | ARB                            | 97                       | 2,685              | Available            |
| COLM <sup>72</sup>       | Head-to-head       | Age 65-84 years, hypertension (treated: BP ≥140/90 mmHg; untreated: BP ≥160/100 mmHg), CVD history or CVD risk factors (diabetes, dyslipidemia)                                                                                                                                                                                   | Secondary/malignant hypertension, recent major CVD, revascularisation, angina pectoris hospitalisation or severe heart failure, atrial fibrillation, hepatic or renal dysfunction                                                                          | 3.0                        | ARB and diuretic  | ARB and CCB                    | 26                       | 3,779              | Available            |
| COPE <sup>57</sup>       | Head-to-head       | Age 40-85 years, BP ≥140/90 mmHg                                                                                                                                                                                                                                                                                                  | SBP ≥200 or DBP ≥120 mmHg, secondary hypertension, diabetes, recent CVD or revascularisation, heart failure, atrial fibrillation/flutter, hepatic or renal dysfunction, congenital or rheumatic heart disease, cancer                                      | 3.6                        | CCB and ARB       | CCB and diuretic or CCB and BB | 89                       | 2,827              | Available            |
| HIJ-CREATE <sup>58</sup> | Head-to-head       | Age 20-80 years, CAD hospitalisation and hypertension (BP ≥140/90 mmHg or antihypertensive treatment use)                                                                                                                                                                                                                         | Secondary hypertension, recent AMI or CeVD, severe aortic valve stenosis, cardiomyopathy, serum creatinine >2 mg/dl, serum potassium >5 mmol/l, hepatic dysfunction, malignancy                                                                            | 4.0                        | ARB               | non-ARB (including ACEI)       | 25                       | 1269               | Available            |
| HOPE <sup>59</sup>       | Placebo-controlled | Age ≥55 years, CAD, stroke, PVD or diabetes, plus ≥1 risk factor (hypertension, dyslipidemia, smoking, or documented microalbuminuria)                                                                                                                                                                                            | Heart failure, LVEF <40%, using ACEI or Vitamin E, uncontrolled hypertension, nephropathy, or recent MI or stroke                                                                                                                                          | 4.5                        | ACEI              | Placebo                        | 257                      | 5,720              | Unavailable          |
| INSIGHT <sup>60</sup>    | Head-to-head       | Age 55-80 years, hypertensive (SBP ≥150 or DBP ≥95 mmHg, or SBP ≥160 mmHg), ≥1 other risk factor (TC ≥6.43 mmol/l, smoking, family history of premature MI, CAD, other CVD                                                                                                                                                        | None specified                                                                                                                                                                                                                                             | 2.8                        | Diuretic          | CCB                            | 312                      | 5,015              | Unavailable          |
| MOSES <sup>61</sup>      | Head-to-head       | Hypertension requiring treatment, documented TIA, ischemic stroke or cerebral haemorrhage                                                                                                                                                                                                                                         | Internal carotid artery occlusion or stenosis >70%, heart failure, age >85 years, on anticoagulant for cardiac arrhythmia, high-grade aortic or mitral valve stenosis, unstable angina                                                                     | 3.3                        | CCB               | ARB                            | 34                       | 854                | Available            |
| NORDIL <sup>62</sup>     | Head-to-head       | Age 50-74 years, untreated hypertension (DBP ≥100 mmHg on two occasions); if previously treated, DBP ≥100 mmHg on two consecutive visits at one week apart during run-in period and no treatment was given                                                                                                                        | Age <50 or ≥70 years, bradycardia, secondary hypertension, atrial fibrillation, recent CeVD or MI, heart failure                                                                                                                                           | 4.2                        | BB and diuretic   | CCB                            | 465                      | 10,154             | Available            |
| ONTARGET <sup>73</sup>   | Head-to-head       | CAD, PAD, CeVD or diabetes with end-organ damage                                                                                                                                                                                                                                                                                  | Heart failure, pericarditis, congenital heart disease, unexplained syncope, planned revascularisation <3 months of consent, uncontrolled hypertension, heart transplant, subarachnoid haemorrhage, renal artery disease, proteinuria, hepatic dysfunction, | 4.8                        | ARB or ACEI       | ACEI, ARB                      | 1,088                    | 16,008             | Available            |

|                         |                    |                                                                                                                                                                                                                                                                                                                    |                                                                                                                                                                                                                                                                            |     |                      |              |       |        |             |
|-------------------------|--------------------|--------------------------------------------------------------------------------------------------------------------------------------------------------------------------------------------------------------------------------------------------------------------------------------------------------------------|----------------------------------------------------------------------------------------------------------------------------------------------------------------------------------------------------------------------------------------------------------------------------|-----|----------------------|--------------|-------|--------|-------------|
|                         |                    |                                                                                                                                                                                                                                                                                                                    | volume, or sodium depletion, primary hyper-aldosteronism, hereditary fructose intolerance, other serious conditions                                                                                                                                                        |     |                      |              |       |        |             |
| PEACE <sup>64</sup>     | Placebo-controlled | Age ≥50 years, documented CAD                                                                                                                                                                                                                                                                                      | Unstable angina, severe valvular heart disease, recent revascularisation, planned elective revascularisation, limited 5-year survival, serum creatinine >177 μmol/l, serum potassium >5.5 mmol/l                                                                           | 4.7 | ACEI                 | Placebo      | 734   | 6,910  | Available   |
| PROGRESS <sup>65</sup>  | Placebo-controlled | Stroke or TIA in the past 5 years                                                                                                                                                                                                                                                                                  | Indication or contraindication for ACEI                                                                                                                                                                                                                                    | 3.9 | ACEI and/or diuretic | Placebo      | 168   | 5,344  | Available   |
| STOP2 <sup>74</sup>     | Head-to-head       | Aged 70-84 years, SBP ≥180 mmHg and/or DBP ≥105 mmHg                                                                                                                                                                                                                                                               | Not specified                                                                                                                                                                                                                                                              | 4.5 | BB and/or diuretic   | ACEI and CCB | 288   | 5,895  | Available   |
| SYSTEUR <sup>75</sup>   | Placebo-controlled | Age ≥60 years, sitting SBP 160-219 mmHg, sitting DBP <95 mmHg, and standing SBP ≥140 mmHg                                                                                                                                                                                                                          | Secondary hypertension, retinal haemorrhage/papilledema, heart failure, dissecting aortic aneurysm, serum creatinine ≥180 μmol/l, recent severe nosebleeds, stroke or MI, dementia, disorders prohibiting standing position, severe CVD/non-CVD                            | 2.6 | CCB                  | Placebo      | 185   | 4,246  | Available   |
| TRANSCEND <sup>68</sup> | Placebo-controlled | Intolerant to ACEI and with established CAD, PVD, CeVD or diabetes with end-organ damage                                                                                                                                                                                                                           | Heart failure, valvular/cardiac outflow tract obstruction, pericarditis, congenital heart disease, unexplained syncope, recent revascularisation, SBP >160 mmHg, heart transplantation, subarachnoid haemorrhage, significant renal stenosis, renal or hepatic dysfunction | 4.9 | ARB                  | Placebo      | 454   | 3,808  | Available   |
| VALUE <sup>69</sup>     | Head-to-head       | Age ≥50 years, hypertension, CVD, CVD risk factors (male sex, age >50 years, diabetes, current smoking, high cholesterol, LVH, proteinuria, serum creatinine 150 to 265 μmol/l)                                                                                                                                    | Renal artery stenosis, recent CAD or CeVD, severe hepatic disease or chronic renal failure, heart failure, on monotherapy with BB for CAD and hypertension                                                                                                                 | 4.2 | CCB-based            | ARB-based    | 1,535 | 10,422 | Unavailable |
| PROFESS <sup>70</sup>   | Placebo-controlled | Age ≥55 years with ischemic stroke <90 days before randomisation (later modified to include age 50 to 54 years or had stroke 90 to 120 days before randomisation if with ≥2 additional risk factors: diabetes, hypertension, smoker, obesity previous CVD, end-organ damage or hyperlipidemia) and remained stable | Haemorrhagic stroke, severe disability after the qualifying stroke, contraindication to treatments                                                                                                                                                                         | 2.5 | ARB                  | Placebo      | 248   | 14211  | Available   |

\* Treatment arm in head-to-head trials compared two or more drug classes defined based on the following predefined structure: the arm with the greater systolic blood pressure reduction was considered the intervention and the other(s) as the comparator.

† All patients with known diabetes diagnosis at baseline have been excluded.

¶ All trials without information for the time of diabetes occurrence were excluded from the individual patient data meta-analysis to assess the effect of blood pressure reduction and risk of diabetes.

BP: blood pressure; GFR: Glomerular filtration rate; DBP: diastolic blood pressure; CKD: chronic kidney disease; T2D: type 2 diabetes; CAD: coronary artery disease; CeVD: cerebrovascular disease; CVD: cardiovascular disease; HbA1c: glycated haemoglobin; SBP: systolic blood pressure; TIA: transient ischemic attack; PAD: peripheral artery disease; MI: myocardial infarction; CNS: the central nervous system; LVEF: left ventricular ejection fraction; HDL: high-density lipoprotein; ECG: electrocardiogram; TC: total cholesterol; LVH: left ventricular hypertrophy; T1D: type 1 diabetes; CCB: calcium channel-blocker; ACEI: angiotensin-converting enzyme inhibitor; ARB: angiotensin II receptor blocker; BB: beta blocker

ACTIVE I: Atrial Fibrillation Clopidogrel Trial with Irbesartan for Prevention of Vascular Events; ALLHAT: Antihypertensive and Lipid Lowering Treatment to Prevent Heart Attack Trial; ANBP: Australian National Blood Pressure Study; ANBP2: Second Australian National Blood Pressure Study; ASCOT-BPLA: Anglo-Scandinavian Cardiac Outcomes Trial-Blood Pressure Lowering Arm; CAPPP: Captopril Prevention Project; CASE-J: Candesartan Antihypertensive Survival Evaluation in Japan Trial; COLM: Combination of OLMesartan study; COPE: Combination Therapy of Hypertension to Prevent Cardiovascular Events; HIJ-CREATE: Heart Institute of Japan Candesartan Randomized Trial for Evaluation in Coronary Artery Disease; HOPE: Heart Outcomes Prevention Evaluation; INSIGHT: International Nifedipine GITS study: Intervention as a Goal in Hypertension Treatment; MOSES: Morbidity and Mortality After Stroke, Eprosartan Compared With Nitrendipine for Secondary Prevention; NORDIL: Nordic Diltiazem Study; ONTARGET: Ongoing Telmisartan Alone and in Combination with Ramipril Global Endpoint Trial; PEACE: Prevention of Events with Angiotensin-Converting Enzyme Inhibition; PROFESS: Prevention Regimen for Effectively Avoiding Second Strokes; PROGRESS: Perindopril Protection Against Recurrent Stroke Study; STOP Hypertension-2: Swedish Trial in Old Patients with Hypertension-2; Syst-Eur: Systolic Hypertension in Europe; TRANSCEND: Telmisartan Randomized Assessment Study in ACE Intolerant Subjects with Cardiovascular Disease; VALUE: Valsartan Antihypertensive Long-term Use Evaluation

Table S4. Genetic variants selected as an instrumental variable for systolic blood pressure  
(the information in this Table is extracted and modified from the main genome-wide association study by Evangelou et al.)<sup>1</sup>

| SNP *      | Chromosome | Position (GRCh37) | Allele1 | Allele2 | Freq1† | Effect † | Standard error † | P-value† | Source *               |
|------------|------------|-------------------|---------|---------|--------|----------|------------------|----------|------------------------|
| rs3737801  | 1          | 27960832          | c       | g       | 0.9142 | 0.4246   | 0.0954           | 8.67E-06 | Novel:one-stage design |
| rs11210029 | 1          | 41865293          | a       | g       | 0.625  | -0.1608  | 0.0476           | 0.000728 | Novel:one-stage design |
| rs11579440 | 1          | 49052423          | t       | c       | 0.8468 | 0.2794   | 0.0653           | 1.86E-05 | Novel:one-stage design |
| rs10923038 | 1          | 88651771          | a       | c       | 0.6166 | 0.1279   | 0.0481           | 0.00781  | Novel:one-stage design |
| rs76719272 | 1          | 156129796         | t       | c       | 0.1309 | -0.2747  | 0.0727           | 0.00016  | Novel:two-stage design |
| rs1043069  | 1          | 180859368         | t       | g       | 0.6225 | 0.2696   | 0.0478           | 1.72E-08 | Novel:two-stage design |
| rs4651224  | 1          | 184585182         | t       | c       | 0.4518 | 0.144    | 0.047            | 0.002185 | Novel:two-stage design |
| rs12042924 | 1          | 197297417         | t       | c       | 0.5202 | -0.1372  | 0.0465           | 0.003202 | Novel:two-stage design |
| rs33996239 | 1          | 203109801         | t       | c       | 0.0577 | -0.427   | 0.1058           | 5.43E-05 | Novel:two-stage design |
| rs7555285  | 1          | 209970355         | c       | g       | 0.7951 | 0.173    | 0.0565           | 0.002212 | Novel:two-stage design |
| rs260508   | 1          | 2187085           | t       | g       | 0.6167 | 0.1696   | 0.0477           | 0.000377 | Novel:two-stage design |
| rs2807337  | 1          | 22577371          | t       | c       | 0.3721 | 0.1938   | 0.0478           | 5.02E-05 | Novel:two-stage design |
| rs4926499  | 1          | 249155909         | c       | g       | 0.8262 | 0.2922   | 0.0752           | 0.000102 | Novel:two-stage design |
| rs79598313 | 1          | 27284913          | t       | c       | 0.0275 | 0.5126   | 0.1518           | 0.00073  | Novel:two-stage design |
| rs839755   | 1          | 43856410          | a       | c       | 0.6224 | -0.1877  | 0.047            | 6.55E-05 | Novel:two-stage design |
| rs7514579  | 1          | 94051350          | a       | c       | 0.7765 | 0.3027   | 0.0559           | 6.16E-08 | Novel:two-stage design |
| rs17396055 | 1          | 94730954          | a       | g       | 0.3317 | -0.1525  | 0.049            | 0.001874 | Novel:two-stage design |
| rs880315   | 1          | 10796866          | t       | c       | 0.652  | -0.5218  | 0.0499           | 1.33E-25 | Previously reported    |
| rs4846049  | 1          | 11850365          | t       | g       | 0.3264 | -0.4146  | 0.0489           | 2.44E-17 | Previously reported    |
| rs17367504 | 1          | 11862778          | a       | g       | 0.8444 | 0.7774   | 0.0639           | 4.81E-34 | Previously reported    |
| rs5068     | 1          | 11905974          | a       | g       | 0.9387 | 1.0914   | 0.0989           | 2.53E-28 | Previously reported    |
| rs3820068  | 1          | 15798197          | a       | g       | 0.7977 | 0.3361   | 0.0596           | 1.69E-08 | Previously reported    |
| rs7515635  | 1          | 42408070          | t       | c       | 0.4684 | 0.2382   | 0.0463           | 2.70E-07 | Previously reported    |
| rs10922502 | 1          | 89360158          | a       | g       | 0.6407 | -0.2283  | 0.0483           | 2.32E-06 | Previously reported    |
| rs55732192 | 2          | 162278233         | t       | g       | 0.0962 | -0.2807  | 0.0798           | 0.000433 | Novel:one-stage design |
| rs6712203  | 2          | 165557318         | t       | c       | 0.3779 | -0.1943  | 0.0477           | 4.57E-05 | Novel:one-stage design |
| rs11694601 | 2          | 174949358         | a       | g       | 0.5927 | -0.1422  | 0.047            | 0.00249  | Novel:one-stage design |

|             |   |           |   |   |        |         |        |          |                        |
|-------------|---|-----------|---|---|--------|---------|--------|----------|------------------------|
| rs1837164   | 2 | 178716601 | a | t | 0.3753 | 0.186   | 0.0472 | 8.27E-05 | Novel:one-stage design |
| rs296797    | 2 | 201102905 | t | c | 0.4142 | 0.2067  | 0.0467 | 9.68E-06 | Novel:one-stage design |
| rs1047891   | 2 | 211540507 | a | c | 0.3243 | -0.1647 | 0.0511 | 0.00127  | Novel:one-stage design |
| rs10189186  | 2 | 53025757  | a | g | 0.5357 | 0.1752  | 0.0459 | 0.000135 | Novel:one-stage design |
| rs28377357  | 2 | 112769721 | a | g | 0.3    | -0.1588 | 0.0502 | 0.001572 | Novel:two-stage design |
| rs6723509   | 2 | 122000745 | t | c | 0.8617 | 0.2553  | 0.0677 | 0.000162 | Novel:two-stage design |
| rs72844590  | 2 | 138421227 | t | g | 0.1441 | 0.0856  | 0.0692 | 0.2158   | Novel:two-stage design |
| rs79523138  | 2 | 161368213 | a | g | 0.8849 | -0.3083 | 0.0749 | 3.83E-05 | Novel:two-stage design |
| rs6739913   | 2 | 185033065 | a | g | 0.7095 | -0.1523 | 0.0506 | 0.002638 | Novel:two-stage design |
| rs28558491  | 2 | 187816321 | t | c | 0.7362 | -0.1935 | 0.0531 | 0.000265 | Novel:two-stage design |
| rs67720684  | 2 | 18975439  | a | c | 0.2295 | 0.0834  | 0.0546 | 0.1269   | Novel:two-stage design |
| rs12694277  | 2 | 213188795 | t | c | 0.2914 | -0.219  | 0.051  | 1.77E-05 | Novel:two-stage design |
| rs1044822   | 2 | 230629138 | t | c | 0.142  | -0.2655 | 0.0657 | 5.38E-05 | Novel:two-stage design |
| rs139354822 | 2 | 242344695 | t | c | 0.9675 | 0.4794  | 0.1554 | 0.002042 | Novel:two-stage design |
| rs35590893  | 2 | 43716933  | a | g | 0.2716 | -0.1215 | 0.0515 | 0.01822  | Novel:two-stage design |
| rs6545155   | 2 | 50429861  | t | c | 0.7852 | 0.2182  | 0.0559 | 9.56E-05 | Novel:two-stage design |
| rs2920899   | 2 | 55279681  | t | g | 0.7851 | 0.1653  | 0.0573 | 0.003886 | Novel:two-stage design |
| rs72816333  | 2 | 60096560  | a | t | 0.8277 | 0.254   | 0.0606 | 2.79E-05 | Novel:two-stage design |
| rs2300481   | 2 | 66782467  | t | c | 0.3886 | 0.2043  | 0.0472 | 1.50E-05 | Novel:two-stage design |
| rs1446468   | 2 | 164963486 | t | c | 0.4512 | -0.487  | 0.0468 | 2.26E-25 | Previously reported    |
| rs6712094   | 2 | 165043460 | a | g | 0.7296 | 0.42    | 0.0525 | 1.17E-15 | Previously reported    |
| rs6749447   | 2 | 169041386 | t | g | 0.7323 | -0.067  | 0.0523 | 0.2008   | Previously reported    |
| rs6434404   | 2 | 191494411 | a | g | 0.3247 | 0.2228  | 0.0498 | 7.53E-06 | Previously reported    |
| rs1344653   | 2 | 19730845  | a | g | 0.4961 | -0.1568 | 0.0456 | 0.00058  | Previously reported    |
| rs55780018  | 2 | 208526140 | t | c | 0.548  | -0.3278 | 0.0488 | 1.85E-11 | Previously reported    |
| rs2972146   | 2 | 227100698 | t | g | 0.6362 | 0.2486  | 0.0476 | 1.76E-07 | Previously reported    |
| rs55701159  | 2 | 25139596  | t | g | 0.887  | 0.2999  | 0.0742 | 5.27E-05 | Previously reported    |
| rs1275988   | 2 | 26914364  | t | c | 0.6055 | -0.5157 | 0.0466 | 1.83E-28 | Previously reported    |
| rs9678851   | 2 | 27887034  | a | c | 0.559  | -0.1135 | 0.0474 | 0.01662  | Previously reported    |
| rs7562      | 2 | 28635740  | t | c | 0.5297 | 0.1555  | 0.047  | 0.00093  | Previously reported    |

|             |   |           |   |   |        |         |        |          |                        |
|-------------|---|-----------|---|---|--------|---------|--------|----------|------------------------|
| rs13420463  | 2 | 37517566  | a | g | 0.7775 | 0.2751  | 0.0555 | 7.19E-07 | Previously reported    |
| rs262986    | 3 | 183435713 | a | g | 0.4712 | -0.2288 | 0.0468 | 1.01E-06 | Novel:one-stage design |
| rs1882289   | 3 | 114461208 | a | g | 0.8814 | -0.2919 | 0.0708 | 3.78E-05 | Novel:two-stage design |
| rs9875380   | 3 | 132780356 | t | c | 0.4619 | -0.2472 | 0.0457 | 6.21E-08 | Novel:two-stage design |
| rs863930    | 3 | 135949737 | t | g | 0.4671 | -0.191  | 0.046  | 3.28E-05 | Novel:two-stage design |
| rs78151625  | 3 | 158316726 | t | c | 0.831  | -0.222  | 0.0618 | 0.000329 | Novel:two-stage design |
| rs189267552 | 3 | 20073193  | a | t | 0.0141 | -0.7415 | 0.2166 | 0.000618 | Novel:two-stage design |
| rs12638085  | 3 | 30405936  | a | t | 0.3525 | 0.2514  | 0.0486 | 2.30E-07 | Novel:two-stage design |
| rs6788984   | 3 | 41107173  | a | g | 0.858  | 0.3015  | 0.066  | 4.92E-06 | Novel:two-stage design |
| rs6774721   | 3 | 49381898  | a | g | 0.1465 | -0.2171 | 0.0689 | 0.001627 | Novel:two-stage design |
| rs9857362   | 3 | 74710462  | a | c | 0.5249 | 0.1736  | 0.0473 | 0.000241 | Novel:two-stage design |
| rs347591    | 3 | 11290122  | t | g | 0.6625 | 0.2842  | 0.0489 | 6.31E-09 | Previously reported    |
| rs11128722  | 3 | 14958126  | a | g | 0.5628 | -0.2518 | 0.047  | 8.53E-08 | Previously reported    |
| rs143112823 | 3 | 154707967 | a | g | 0.076  | -0.4019 | 0.0949 | 2.29E-05 | Previously reported    |
| rs3097937   | 4 | 124794644 | a | t | 0.8075 | 0.2388  | 0.0587 | 4.77E-05 | Novel:one-stage design |
| rs6823767   | 4 | 151295085 | t | c | 0.7227 | -0.1566 | 0.0528 | 0.003027 | Novel:one-stage design |
| rs7439567   | 4 | 138464842 | t | c | 0.4157 | 0.245   | 0.0474 | 2.39E-07 | Novel:two-stage design |
| rs17035181  | 4 | 157678511 | t | g | 0.8549 | 0.2169  | 0.0653 | 0.000898 | Novel:two-stage design |
| rs2610990   | 4 | 18008232  | a | g | 0.2693 | -0.2325 | 0.0523 | 8.86E-06 | Novel:two-stage design |
| rs231708    | 4 | 2694773   | c | g | 0.6983 | -0.2643 | 0.0499 | 1.19E-07 | Novel:two-stage design |
| rs12511987  | 4 | 46595623  | t | g | 0.8224 | -0.2456 | 0.0614 | 6.26E-05 | Novel:two-stage design |
| rs1347345   | 4 | 95938386  | a | g | 0.6206 | -0.1645 | 0.0478 | 0.000583 | Novel:two-stage design |
| rs13112725  | 4 | 106911742 | c | g | 0.7682 | 0.397   | 0.0557 | 1.01E-12 | Previously reported    |
| rs2291435   | 4 | 38387395  | t | c | 0.5248 | -0.2419 | 0.0463 | 1.74E-07 | Previously reported    |
| rs2014912   | 4 | 86715670  | t | c | 0.1515 | 0.5122  | 0.0644 | 1.80E-15 | Previously reported    |
| rs1650911   | 5 | 141740620 | c | g | 0.7619 | 0.2465  | 0.0584 | 2.42E-05 | Novel:one-stage design |
| rs12153395  | 5 | 179411477 | a | g | 0.1133 | -0.2602 | 0.0764 | 0.000661 | Novel:one-stage design |
| rs4957026   | 5 | 361148    | a | g | 0.3503 | 0.2214  | 0.0497 | 8.29E-06 | Novel:one-stage design |
| rs6875372   | 5 | 64079015  | a | t | 0.5154 | 0.2228  | 0.0459 | 1.18E-06 | Novel:one-stage design |
| rs1871190   | 5 | 97953719  | t | g | 0.3472 | 0.1658  | 0.0495 | 0.000805 | Novel:one-stage design |

|            |   |           |   |   |        |         |        |          |                        |
|------------|---|-----------|---|---|--------|---------|--------|----------|------------------------|
| rs62373688 | 5 | 127352807 | a | t | 0.1259 | 0.3593  | 0.0714 | 4.76E-07 | Novel:two-stage design |
| rs10069690 | 5 | 1279790   | t | c | 0.2583 | 0.3827  | 0.0627 | 1.03E-09 | Novel:two-stage design |
| rs702395   | 5 | 140086677 | t | c | 0.4369 | 0.2367  | 0.0468 | 4.31E-07 | Novel:two-stage design |
| rs74774746 | 5 | 33411769  | c | g | 0.2639 | -0.1177 | 0.0541 | 0.02953  | Novel:two-stage design |
| rs13179413 | 5 | 55868097  | t | c | 0.2775 | 0.1383  | 0.0544 | 0.01098  | Novel:two-stage design |
| rs3121685  | 5 | 65662133  | t | c | 0.4815 | -0.2015 | 0.046  | 1.17E-05 | Novel:two-stage design |
| rs246973   | 5 | 68007803  | t | c | 0.2833 | 0.1984  | 0.0509 | 9.60E-05 | Novel:two-stage design |
| rs709668   | 5 | 96174186  | a | g | 0.1965 | -0.2755 | 0.0576 | 1.72E-06 | Novel:two-stage design |
| rs10077885 | 5 | 114390121 | a | c | 0.498  | -0.2465 | 0.0484 | 3.54E-07 | Previously reported    |
| rs1008058  | 5 | 122435627 | a | g | 0.1183 | 0.3142  | 0.0766 | 4.12E-05 | Previously reported    |
| rs13359291 | 5 | 122476457 | a | g | 0.1654 | 0.4005  | 0.062  | 1.06E-10 | Previously reported    |
| rs6595838  | 5 | 127868199 | a | g | 0.2891 | 0.2361  | 0.0507 | 3.14E-06 | Previously reported    |
| rs11953630 | 5 | 157845402 | t | c | 0.3694 | -0.4463 | 0.0501 | 5.15E-19 | Previously reported    |
| rs1421811  | 5 | 32714270  | c | g | 0.6116 | 0.4743  | 0.0477 | 2.46E-23 | Previously reported    |
| rs1173771  | 5 | 32815028  | a | g | 0.3976 | -0.5227 | 0.0468 | 6.04E-29 | Previously reported    |
| rs10059921 | 5 | 87514515  | t | g | 0.0846 | -0.3732 | 0.0919 | 4.89E-05 | Previously reported    |
| rs7765526  | 6 | 147713764 | a | g | 0.4682 | 0.2317  | 0.047  | 8.11E-07 | Novel:one-stage design |
| rs9449350  | 6 | 82281417  | t | c | 0.673  | -0.2333 | 0.0488 | 1.72E-06 | Novel:one-stage design |
| rs9401090  | 6 | 119113317 | t | c | 0.7538 | 0.2512  | 0.054  | 3.32E-06 | Novel:two-stage design |
| rs10782230 | 6 | 126228512 | a | g | 0.4907 | 0.2787  | 0.0459 | 1.27E-09 | Novel:two-stage design |
| rs9885632  | 6 | 131311909 | t | c | 0.7338 | 0.245   | 0.052  | 2.42E-06 | Novel:two-stage design |
| rs7763294  | 6 | 140383733 | t | g | 0.3169 | -0.2059 | 0.0493 | 2.95E-05 | Novel:two-stage design |
| rs2745599  | 6 | 1613686   | a | g | 0.5476 | 0.2128  | 0.0513 | 3.30E-05 | Novel:two-stage design |
| rs9368222  | 6 | 20686996  | a | c | 0.2767 | 0.1639  | 0.0511 | 0.001338 | Novel:two-stage design |
| rs6911827  | 6 | 22130601  | t | c | 0.4623 | 0.152   | 0.0473 | 0.001295 | Previously reported    |
| rs2270860  | 6 | 43270151  | t | c | 0.3092 | 0.2966  | 0.05   | 3.09E-09 | Previously reported    |
| rs10948071 | 6 | 43280713  | t | c | 0.5993 | -0.2074 | 0.0465 | 8.13E-06 | Previously reported    |
| rs1563788  | 6 | 43308363  | t | c | 0.2937 | 0.3062  | 0.0501 | 9.79E-10 | Previously reported    |
| rs78648104 | 6 | 50683009  | t | c | 0.8985 | -0.3571 | 0.083  | 1.69E-05 | Previously reported    |
| rs35410524 | 6 | 96885405  | t | c | 0.1917 | 0.2999  | 0.0588 | 3.38E-07 | Previously reported    |

|             |   |           |   |   |        |         |        |          |                        |
|-------------|---|-----------|---|---|--------|---------|--------|----------|------------------------|
| rs1870735   | 7 | 155744303 | c | g | 0.4548 | 0.2137  | 0.0486 | 1.08E-05 | Novel:one-stage design |
| rs12979     | 7 | 24738164  | c | g | 0.8745 | 0.2241  | 0.0693 | 0.001227 | Novel:one-stage design |
| rs34072724  | 7 | 130432469 | a | g | 0.4828 | -0.1967 | 0.0465 | 2.37E-05 | Novel:two-stage design |
| rs12703989  | 7 | 140238048 | a | g | 0.494  | 0.1026  | 0.0474 | 0.03035  | Novel:two-stage design |
| rs11771693  | 7 | 150050111 | a | g | 0.6743 | 0.169   | 0.0502 | 0.000757 | Novel:two-stage design |
| rs10274928  | 7 | 28142088  | a | g | 0.4932 | 0.1644  | 0.0475 | 0.000538 | Novel:two-stage design |
| rs10233127  | 7 | 30933453  | a | t | 0.1087 | 0.2638  | 0.0805 | 0.001051 | Novel:two-stage design |
| rs6593297   | 7 | 56122058  | a | t | 0.3178 | 0.0982  | 0.0523 | 0.06052  | Novel:two-stage design |
| rs6963105   | 7 | 75097488  | a | g | 0.4432 | -0.2035 | 0.0531 | 0.000127 | Novel:two-stage design |
| rs848445    | 7 | 77572461  | t | c | 0.2821 | -0.2067 | 0.0528 | 9.04E-05 | Novel:two-stage design |
| rs17477177  | 7 | 106411858 | t | c | 0.7906 | -0.5642 | 0.0564 | 1.60E-23 | Previously reported    |
| rs4728142   | 7 | 128573967 | a | g | 0.4383 | -0.2155 | 0.0467 | 3.91E-06 | Previously reported    |
| rs13238550  | 7 | 131059056 | a | g | 0.3909 | 0.1695  | 0.0472 | 0.000329 | Previously reported    |
| rs10224002  | 7 | 151415041 | a | g | 0.7186 | -0.2375 | 0.0525 | 5.99E-06 | Previously reported    |
| rs6969780   | 7 | 27159136  | c | g | 0.0961 | 0.3697  | 0.0793 | 3.12E-06 | Previously reported    |
| rs142449193 | 8 | 102750597 | t | c | 0.0491 | -0.4354 | 0.112  | 0.000102 | Novel:one-stage design |
| rs4875958   | 8 | 1721090   | a | g | 0.7099 | 0.2209  | 0.0515 | 1.83E-05 | Novel:one-stage design |
| rs2979470   | 8 | 30288272  | t | c | 0.4873 | 0.2114  | 0.046  | 4.25E-06 | Novel:one-stage design |
| rs2354862   | 8 | 64501744  | a | c | 0.6441 | 0.2139  | 0.0485 | 1.03E-05 | Novel:one-stage design |
| rs13253358  | 8 | 68920135  | t | c | 0.297  | 0.1945  | 0.0504 | 0.000113 | Novel:one-stage design |
| rs61040371  | 8 | 8503700   | t | c | 0.6221 | 0.191   | 0.0475 | 5.68E-05 | Novel:one-stage design |
| rs62526122  | 8 | 92769569  | a | g | 0.2707 | 0.1739  | 0.0557 | 0.001806 | Novel:one-stage design |
| rs1986971   | 8 | 10268736  | a | g | 0.7048 | 0.2632  | 0.051  | 2.49E-07 | Novel:two-stage design |
| rs4598218   | 8 | 129483956 | t | c | 0.614  | 0.1523  | 0.048  | 0.001523 | Novel:two-stage design |
| rs4129585   | 8 | 143312933 | a | c | 0.4438 | 0.1977  | 0.0467 | 2.30E-05 | Novel:two-stage design |
| rs1906672   | 8 | 38130025  | a | g | 0.2275 | 0.2644  | 0.055  | 1.51E-06 | Novel:two-stage design |
| rs6996733   | 8 | 60535824  | t | c | 0.8439 | 0.1904  | 0.0647 | 0.003269 | Novel:two-stage design |
| rs72688070  | 8 | 81393697  | t | c | 0.1714 | -0.1536 | 0.0621 | 0.01338  | Novel:two-stage design |
| rs62491354  | 8 | 9730663   | a | g | 0.1401 | 0.3376  | 0.0663 | 3.59E-07 | Novel:two-stage design |
| rs35783704  | 8 | 105966258 | a | g | 0.1092 | -0.5219 | 0.0773 | 1.50E-11 | Previously reported    |

|             |    |           |   |   |        |         |        |          |                        |
|-------------|----|-----------|---|---|--------|---------|--------|----------|------------------------|
| rs2898290   | 8  | 11433909  | t | c | 0.4835 | 0.3419  | 0.0466 | 2.12E-13 | Previously reported    |
| rs4841569   | 8  | 11452177  | a | g | 0.4123 | -0.3758 | 0.0511 | 1.94E-13 | Previously reported    |
| rs6557876   | 8  | 25900675  | t | c | 0.2511 | -0.3667 | 0.0533 | 5.98E-12 | Previously reported    |
| rs520015    | 9  | 211762    | c | g | 0.5144 | 0.2043  | 0.0456 | 7.60E-06 | Novel:one-stage design |
| rs9886665   | 9  | 22942770  | t | c | 0.2721 | 0.1887  | 0.0519 | 0.000277 | Novel:one-stage design |
| rs60191654  | 9  | 753648    | a | g | 0.8143 | -0.2311 | 0.0584 | 7.50E-05 | Novel:one-stage design |
| rs7023828   | 9  | 128498594 | t | c | 0.423  | -0.2466 | 0.0464 | 1.10E-07 | Novel:two-stage design |
| rs1891730   | 9  | 130309028 | t | c | 0.6198 | -0.1749 | 0.0479 | 0.000257 | Novel:two-stage design |
| rs184457    | 9  | 131940019 | a | g | 0.2995 | -0.1157 | 0.0498 | 0.02015  | Novel:two-stage design |
| rs28558845  | 9  | 4334791   | c | g | 0.1568 | -0.2472 | 0.0652 | 0.00015  | Novel:two-stage design |
| rs1332813   | 9  | 9350706   | t | c | 0.3515 | 0.1771  | 0.0472 | 0.000175 | Novel:two-stage design |
| rs7045409   | 9  | 95201540  | a | t | 0.3681 | -0.1498 | 0.0473 | 0.001553 | Novel:two-stage design |
| rs111245230 | 9  | 113169775 | t | c | 0.9662 | -0.6917 | 0.1299 | 9.99E-08 | Previously reported    |
| rs11592107  | 10 | 122968964 | a | g | 0.3087 | 0.2721  | 0.0495 | 3.93E-08 | Novel:one-stage design |
| rs72834453  | 10 | 124235226 | t | g | 0.8742 | -0.2378 | 0.0712 | 0.000839 | Novel:one-stage design |
| rs3802517   | 10 | 28233469  | a | t | 0.4668 | 0.188   | 0.0456 | 3.80E-05 | Novel:one-stage design |
| rs11187142  | 10 | 94468685  | t | c | 0.1047 | 0.298   | 0.0763 | 9.34E-05 | Novel:one-stage design |
| rs11197813  | 10 | 118523933 | a | g | 0.7025 | -0.1612 | 0.0505 | 0.0014   | Novel:two-stage design |
| rs7912283   | 10 | 133773019 | a | g | 0.642  | -0.2008 | 0.0505 | 7.02E-05 | Novel:two-stage design |
| rs1133400   | 10 | 134459388 | a | g | 0.7954 | -0.307  | 0.0601 | 3.24E-07 | Novel:two-stage design |
| rs34130368  | 10 | 48411796  | t | g | 0.1197 | -0.1772 | 0.0816 | 0.02998  | Novel:two-stage design |
| rs56352451  | 10 | 5804865   | t | c | 0.1337 | 0.3049  | 0.0672 | 5.69E-06 | Novel:two-stage design |
| rs12572586  | 10 | 74751579  | t | c | 0.9383 | -0.4496 | 0.1012 | 8.86E-06 | Novel:two-stage design |
| rs112184198 | 10 | 102604514 | a | g | 0.1058 | -0.5331 | 0.0761 | 2.40E-12 | Previously reported    |
| rs1004467   | 10 | 104594507 | a | g | 0.9028 | 0.8884  | 0.0785 | 1.08E-29 | Previously reported    |
| rs11191548  | 10 | 104846178 | t | c | 0.9129 | 1.0233  | 0.0818 | 6.19E-36 | Previously reported    |
| rs4746172   | 10 | 75855842  | t | c | 0.7348 | -0.1017 | 0.0528 | 0.0542   | Previously reported    |
| rs932764    | 10 | 95895940  | a | g | 0.5561 | -0.3654 | 0.0467 | 4.84E-15 | Previously reported    |
| rs10766533  | 11 | 19224677  | a | t | 0.7004 | 0.2572  | 0.0515 | 5.85E-07 | Novel:one-stage design |
| rs11031051  | 11 | 30355707  | a | c | 0.683  | -0.1902 | 0.0493 | 0.000116 | Novel:two-stage design |



|             |    |           |   |   |        |         |        |          |                        |
|-------------|----|-----------|---|---|--------|---------|--------|----------|------------------------|
| rs190194639 | 11 | 34068037  | t | c | 0.0823 | 0.3274  | 0.0862 | 0.000146 | Novel:two-stage design |
| rs1585453   | 11 | 46884713  | a | t | 0.8866 | -0.2449 | 0.0775 | 0.00157  | Novel:two-stage design |
| rs4385883   | 11 | 51539339  | a | t | 0.7047 | 0.2189  | 0.0566 | 0.000112 | Novel:two-stage design |
| rs4980515   | 11 | 63744609  | t | c | 0.504  | 0.227   | 0.0464 | 1.01E-06 | Novel:two-stage design |
| rs67976715  | 11 | 68023742  | c | g | 0.2282 | 0.2708  | 0.0555 | 1.04E-06 | Novel:two-stage design |
| rs10743086  | 11 | 8774923   | a | g | 0.2086 | -0.2193 | 0.0567 | 0.000111 | Novel:two-stage design |
| rs7129220   | 11 | 10350538  | a | g | 0.1233 | 0.3919  | 0.0724 | 6.28E-08 | Previously reported    |
| rs1401454   | 11 | 16250183  | t | c | 0.3998 | 0.3365  | 0.0469 | 7.10E-13 | Previously reported    |
| rs757081    | 11 | 17351683  | c | g | 0.6644 | -0.2958 | 0.0487 | 1.29E-09 | Previously reported    |
| rs5219      | 11 | 17409572  | t | c | 0.3755 | 0.32    | 0.0471 | 1.12E-11 | Previously reported    |
| rs661348    | 11 | 1905292   | t | c | 0.5632 | -0.3417 | 0.0502 | 9.56E-12 | Previously reported    |
| rs217727    | 11 | 2016908   | a | g | 0.192  | 0.3626  | 0.061  | 2.85E-09 | Previously reported    |
| rs11537751  | 11 | 47587452  | t | c | 0.0521 | 0.3936  | 0.1076 | 0.000256 | Previously reported    |
| rs11229457  | 11 | 58207203  | t | c | 0.2144 | -0.2886 | 0.0563 | 2.97E-07 | Previously reported    |
| rs3741378   | 11 | 65408937  | t | c | 0.1328 | -0.4169 | 0.0696 | 2.15E-09 | Previously reported    |
| rs7927515   | 11 | 76125330  | a | c | 0.3455 | 0.1705  | 0.0488 | 0.000479 | Previously reported    |
| rs117206641 | 12 | 133086888 | t | c | 0.1145 | 0.3348  | 0.0783 | 1.88E-05 | Novel:one-stage design |
| rs28621435  | 12 | 13860990  | a | g | 0.1187 | -0.3138 | 0.0729 | 1.69E-05 | Novel:one-stage design |
| rs4143175   | 12 | 67782397  | t | c | 0.239  | 0.3055  | 0.0533 | 9.90E-09 | Novel:one-stage design |
| rs5742643   | 12 | 102837863 | t | c | 0.2505 | -0.2603 | 0.0534 | 1.07E-06 | Novel:two-stage design |
| rs11112548  | 12 | 105871914 | a | t | 0.9558 | 0.5768  | 0.1203 | 1.64E-06 | Novel:two-stage design |
| rs11571376  | 12 | 1059556   | c | g | 0.7011 | -0.1164 | 0.0506 | 0.0215   | Novel:two-stage design |
| rs2024385   | 12 | 12888438  | a | t | 0.4186 | -0.243  | 0.0467 | 1.99E-07 | Novel:two-stage design |
| rs7976167   | 12 | 24210599  | t | c | 0.6893 | 0.1409  | 0.0489 | 0.003922 | Novel:two-stage design |
| rs10437954  | 12 | 58003922  | a | g | 0.9064 | -0.4326 | 0.0832 | 2.01E-07 | Novel:two-stage design |
| rs7963801   | 12 | 79685226  | t | c | 0.4129 | -0.2145 | 0.0482 | 8.45E-06 | Novel:two-stage design |
| rs10858966  | 12 | 90567026  | c | g | 0.3035 | 0.2024  | 0.05   | 5.12E-05 | Novel:two-stage design |
| rs2384550   | 12 | 115352731 | a | g | 0.3457 | -0.2748 | 0.0473 | 6.29E-09 | Previously reported    |
| rs1126930   | 12 | 49399132  | c | g | 0.0343 | 0.5757  | 0.14   | 3.93E-05 | Previously reported    |
| rs73099903  | 12 | 53440779  | t | c | 0.0794 | 0.4218  | 0.0878 | 1.56E-06 | Previously reported    |

|            |    |           |   |   |        |         |        |          |                        |
|------------|----|-----------|---|---|--------|---------|--------|----------|------------------------|
| rs7297416  | 12 | 54443090  | a | c | 0.6867 | 0.2816  | 0.05   | 1.84E-08 | Previously reported    |
| rs2681492  | 12 | 90013089  | t | c | 0.8344 | 0.7729  | 0.0615 | 3.26E-36 | Previously reported    |
| rs17249754 | 12 | 90060586  | a | g | 0.1637 | -0.8015 | 0.0619 | 2.16E-38 | Previously reported    |
| rs2480171  | 13 | 21559858  | t | c | 0.1324 | 0.2057  | 0.0693 | 0.002978 | Novel:one-stage design |
| rs1331012  | 13 | 27115424  | t | g | 0.269  | 0.1514  | 0.051  | 0.002962 | Novel:one-stage design |
| rs4274337  | 13 | 41967193  | a | g | 0.177  | -0.33   | 0.0612 | 6.93E-08 | Novel:one-stage design |
| rs75961402 | 13 | 56398286  | a | g | 0.1516 | 0.2759  | 0.0635 | 1.40E-05 | Novel:one-stage design |
| rs606950   | 13 | 22298923  | a | g | 0.6176 | 0.1755  | 0.047  | 0.000186 | Novel:two-stage design |
| rs9532243  | 13 | 32191408  | a | c | 0.4797 | 0.2485  | 0.0452 | 3.89E-08 | Novel:two-stage design |
| rs73187288 | 13 | 42738672  | a | c | 0.8935 | -0.2492 | 0.0738 | 0.000731 | Novel:two-stage design |
| rs912434   | 13 | 47189928  | t | g | 0.7628 | 0.2107  | 0.0531 | 7.30E-05 | Novel:two-stage design |
| rs9526707  | 13 | 51489186  | a | g | 0.3166 | -0.2364 | 0.0492 | 1.56E-06 | Novel:two-stage design |
| rs78474310 | 13 | 73826901  | a | g | 0.9566 | -0.4412 | 0.1138 | 0.000106 | Novel:two-stage design |
| rs7988232  | 13 | 79808655  | a | g | 0.4146 | 0.1378  | 0.0463 | 0.002917 | Novel:two-stage design |
| rs3011549  | 13 | 113634937 | a | c | 0.2888 | 0.226   | 0.0539 | 2.78E-05 | Previously reported    |
| rs63418562 | 13 | 30146201  | t | c | 0.7462 | -0.3846 | 0.0529 | 3.74E-13 | Previously reported    |
| rs34983854 | 14 | 39858442  | a | g | 0.6064 | -0.2259 | 0.0463 | 1.05E-06 | Novel:one-stage design |
| rs8014182  | 14 | 103859962 | t | c | 0.1388 | -0.3218 | 0.0655 | 8.80E-07 | Novel:two-stage design |
| rs17115145 | 14 | 30122409  | t | c | 0.3909 | 0.1853  | 0.0462 | 6.08E-05 | Novel:two-stage design |
| rs72683923 | 14 | 50735947  | t | c | 0.9767 | 0.7823  | 0.1705 | 4.45E-06 | Novel:two-stage design |
| rs11623535 | 14 | 72462381  | a | g | 0.7393 | 0.1623  | 0.0513 | 0.001552 | Novel:two-stage design |
| rs11159091 | 14 | 75074316  | a | g | 0.4654 | 0.1973  | 0.046  | 1.78E-05 | Novel:two-stage design |
| rs9888615  | 14 | 53377540  | t | c | 0.2936 | -0.2356 | 0.0499 | 2.32E-06 | Previously reported    |
| rs8016306  | 14 | 63928546  | a | g | 0.7931 | 0.1339  | 0.0554 | 0.01569  | Previously reported    |
| rs4965529  | 15 | 100145224 | a | c | 0.1657 | -0.2802 | 0.0622 | 6.60E-06 | Novel:two-stage design |
| rs11634028 | 15 | 76276150  | a | t | 0.205  | 0.2356  | 0.059  | 6.49E-05 | Novel:two-stage design |
| rs3743157  | 15 | 85680532  | a | c | 0.1651 | 0.2069  | 0.0615 | 0.000766 | Novel:two-stage design |
| rs11632436 | 15 | 86295286  | c | g | 0.5045 | 0.1907  | 0.0458 | 3.07E-05 | Novel:two-stage design |
| rs35199222 | 15 | 81013037  | a | g | 0.4398 | 0.2436  | 0.0466 | 1.75E-07 | Previously reported    |
| rs2759308  | 15 | 81016227  | a | g | 0.4758 | 0.2592  | 0.046  | 1.79E-08 | Previously reported    |

|             |    |          |   |   |        |         |        |          |                        |
|-------------|----|----------|---|---|--------|---------|--------|----------|------------------------|
| rs2379829   | 16 | 3538873  | c | g | 0.728  | -0.2143 | 0.0521 | 3.84E-05 | Novel:one-stage design |
| rs34941092  | 16 | 50550137 | a | g | 0.1491 | -0.302  | 0.0651 | 3.53E-06 | Novel:one-stage design |
| rs1012089   | 16 | 74171973 | c | g | 0.4758 | -0.1354 | 0.0456 | 0.002974 | Novel:one-stage design |
| rs3851018   | 16 | 86437811 | c | g | 0.5676 | 0.2224  | 0.0473 | 2.60E-06 | Novel:one-stage design |
| rs6540125   | 16 | 87993889 | t | g | 0.3501 | 0.1864  | 0.0475 | 8.75E-05 | Novel:one-stage design |
| rs35450617  | 16 | 6889675  | t | g | 0.6958 | -0.1542 | 0.051  | 0.002489 | Novel:two-stage design |
| rs7187540   | 16 | 85318302 | a | c | 0.3245 | -0.193  | 0.0563 | 0.000606 | Novel:two-stage design |
| rs9899540   | 17 | 30777924 | a | t | 0.4126 | 0.1809  | 0.0487 | 0.0002   | Novel:one-stage design |
| rs112260610 | 17 | 64252393 | t | c | 0.1353 | 0.3389  | 0.0669 | 4.11E-07 | Novel:one-stage design |
| rs4925159   | 17 | 18185510 | a | g | 0.4192 | 0.2134  | 0.0464 | 4.23E-06 | Novel:two-stage design |
| rs1551355   | 17 | 30032420 | t | c | 0.2369 | 0.1842  | 0.0538 | 0.000621 | Novel:two-stage design |
| rs34430710  | 17 | 56876627 | a | t | 0.6753 | -0.2151 | 0.0487 | 9.87E-06 | Novel:two-stage design |
| rs1036902   | 17 | 58950791 | t | c | 0.8404 | -0.2107 | 0.0634 | 0.000888 | Novel:two-stage design |
| rs112280096 | 17 | 79367409 | a | c | 0.37   | -0.0932 | 0.0561 | 0.09643  | Novel:two-stage design |
| rs12946454  | 17 | 43208121 | a | t | 0.739  | -0.3193 | 0.0518 | 7.30E-10 | Previously reported    |
| rs7406910   | 17 | 46688256 | t | c | 0.0893 | -0.4877 | 0.0812 | 1.93E-09 | Previously reported    |
| rs8068318   | 17 | 59483766 | t | c | 0.7271 | 0.4318  | 0.0536 | 8.20E-16 | Previously reported    |
| rs2240736   | 17 | 59485393 | t | c | 0.7328 | 0.4265  | 0.0525 | 4.49E-16 | Previously reported    |
| rs1154214   | 18 | 24546824 | t | g | 0.3963 | -0.2163 | 0.046  | 2.57E-06 | Novel:one-stage design |
| rs6567160   | 18 | 57829135 | t | c | 0.7644 | 0.1618  | 0.0541 | 0.002765 | Novel:one-stage design |
| rs10460108  | 18 | 73034151 | a | g | 0.4819 | 0.2039  | 0.0452 | 6.40E-06 | Novel:one-stage design |
| rs11876341  | 18 | 48799991 | a | g | 0.6949 | -0.2167 | 0.0518 | 2.89E-05 | Novel:two-stage design |
| rs10048404  | 18 | 54578482 | t | c | 0.3741 | -0.2123 | 0.049  | 1.46E-05 | Novel:two-stage design |
| rs12454712  | 18 | 60845884 | t | c | 0.6224 | 0.1891  | 0.0537 | 0.000429 | Novel:two-stage design |
| rs34413141  | 18 | 777282   | a | t | 0.1796 | -0.337  | 0.0599 | 1.83E-08 | Novel:two-stage design |
| rs12958173  | 18 | 42141977 | a | c | 0.3    | 0.3518  | 0.0495 | 1.21E-12 | Previously reported    |
| rs7256564   | 19 | 33889593 | a | g | 0.3133 | 0.2039  | 0.0487 | 2.87E-05 | Novel:one-stage design |
| rs73046792  | 19 | 49605705 | a | g | 0.1513 | -0.2413 | 0.069  | 0.000474 | Novel:one-stage design |
| rs2613765   | 19 | 5066330  | a | g | 0.4768 | -0.1874 | 0.0455 | 3.85E-05 | Novel:two-stage design |
| rs138877676 | 19 | 50935809 | t | g | 0.0211 | -0.5482 | 0.2033 | 0.006999 | Novel:two-stage design |

|            |    |          |   |   |        |         |        |          |                        |
|------------|----|----------|---|---|--------|---------|--------|----------|------------------------|
| rs17638167 | 19 | 11584818 | t | c | 0.047  | -0.5228 | 0.1095 | 1.81E-06 | Previously reported    |
| rs8105753  | 19 | 31927547 | a | c | 0.6255 | 0.1895  | 0.0487 | 9.88E-05 | Previously reported    |
| rs4247374  | 19 | 7252756  | t | c | 0.1355 | -0.5063 | 0.0753 | 1.76E-11 | Previously reported    |
| rs1764975  | 20 | 4101290  | a | t | 0.7894 | 0.2759  | 0.058  | 1.99E-06 | Novel:one-stage design |
| rs6021247  | 20 | 50108980 | a | g | 0.5289 | 0.1623  | 0.0453 | 0.000338 | Novel:two-stage design |
| rs6031435  | 20 | 42797358 | a | g | 0.5388 | -0.2268 | 0.0456 | 6.72E-07 | Previously reported    |
| rs11701033 | 21 | 33788341 | c | g | 0.8169 | -0.2465 | 0.0592 | 3.18E-05 | Previously reported    |
| rs9608690  | 22 | 28921347 | a | g | 0.0678 | -0.308  | 0.0912 | 0.000733 | Novel:one-stage design |
| rs28578714 | 22 | 50727921 | t | c | 0.6045 | 0.2346  | 0.0538 | 1.28E-05 | Novel:two-stage design |

\* Candidate SNPs selected from Evangelou et al)<sup>1</sup>

† Regression coefficient and corresponding standard error derived from International Consortium for Blood Pressure Genome-Wide Association Studies (ICBP). <sup>4</sup>

Table S5. Post-hoc sensitivity analysis of the effect of systolic blood pressure lowering per se on the risk of new-onset type 2 diabetes, stratified by different diabetes ascertainment methods reported by each trial.

| Trial name | Trial Design | Diabetes ascertainment type as outcome | Diabetes ascertainment type at baseline     | Treatment          | Comparator                         | Treatment |       | Comparator |       | BP difference | Incidence rate | HR (95% CIs) |
|------------|--------------|----------------------------------------|---------------------------------------------|--------------------|------------------------------------|-----------|-------|------------|-------|---------------|----------------|--------------|
|            |              |                                        |                                             |                    |                                    | Events    | Total | Events     | Total |               |                |              |
| ACTIVE I   | Placebo      | AE                                     | History/glucose lowering treatment          | ARBs               | Placebo                            | 196       | 3614  | 213        | 3617  | 2.91          | 13.6           |              |
| ALLHAT     | Drug-drug    | FPG                                    | History/FPG                                 | Diuretics          | ACEIs, CCBs and ARBs               | 1374      | 9719  | 1810       | 17393 | 1.45          | 24.3           |              |
| ANBP       | Placebo      | AE                                     | History/diagnosis                           | Diuretics          | Placebo                            | 14        | 1717  | 13         | 1704  | 9.74          | 2.2            |              |
| ANBP2      | Drug-drug    | AE                                     | History/diagnosis                           | Diuretics          | ACEIs                              | 184       | 2817  | 127        | 2795  | 1.85          | 13.6           |              |
| ASCOT-BPLA | Drug-drug    | FPG                                    | FPG/GTT/ glucose lowering treatment/history | CCBs               | BBs                                | 565       | 7032  | 792        | 6982  | 3.52          | 18.3           |              |
| CAPPP      | Drug-drug    | FPG                                    | FPG/GTT                                     | BBs/Diuretics      | ACEIs                              | 380       | 5205  | 337        | 5154  | 1.18          | 12.0           |              |
| CASEJ      | Drug-drug    | ICD-self report                        | FPG/HbA1c/GTT/ glucose lowering treatment   | CCBs               | ARBs                               | 59        | 1293  | 38         | 1302  | 2.5           | 11.9           |              |
| COLM       | Drug-drug    | AE                                     | History/FPG/GTT                             | ARBs and Diuretics | ARBs and CCBs                      | 15        | 1840  | 11         | 1844  | 0.01          | 2.3            |              |
| COPE       | Drug-drug    | AE                                     | History/diagnosis                           | CCBs and ARBs      | CCBs and Diuretics or CCBs and BBs | 20        | 956   | 69         | 1871  | 0.36          | 8.7            |              |
| HIJCREATE  | Drug-drug    | FPG                                    | FPG/ glucose lowering treatment             | ARBs               | No- ARBs                           | 7         | 645   | 18         | 624   | 0.09          | 4.9            |              |
| MOSES      | Drug-drug    | AE                                     | History/diagnosis                           | CCBs               | ARBs                               | 11        | 416   | 19         | 433   | 3.24          | 10.7           |              |
| NORDIL     | Drug-drug    | AE                                     | History/diagnosis                           | BBs/Diuretics      | CCBs                               | 249       | 5026  | 216        | 4980  | 3.26          | 10.9           |              |
| ONTARGET   | Drug-drug    | FPG                                    | History/diagnosis                           | ACEIs/ARBs         | ARBs and ACEIs                     | 323       | 5280  | 761        | 10717 | 2.52          | 14.8           |              |

|           |           |                 |                       |                 |               |     |      |     |      |      |      |
|-----------|-----------|-----------------|-----------------------|-----------------|---------------|-----|------|-----|------|------|------|
| PEACE     | Placebo   | AE              | History/diagnosis     | ACEIs           | Placebo       | 334 | 3417 | 399 | 3457 | 5.04 | 22.4 |
| PROGRESS  | Placebo   | AE              | History/diagnosis     | ACEIs/Diuretics | Placebo       | 80  | 2657 | 86  | 2685 | 8.35 | 8.0  |
| STOP2     | Drug-drug | FPG             | History/diagnosis     | BBs/Diuretics   | ACEIs or CCBs | 97  | 1954 | 190 | 3923 | 2.57 | 10.8 |
| SYSTEUR   | Placebo   | ICD-self report | History/diagnosis/FPG | CCBs            | Placebo       | 107 | 2165 | 78  | 2069 | 9.46 | 16.8 |
| TRANSCEND | Placebo   | FPG             | History/diagnosis/FPG | ARBs            | Placebo       | 205 | 1889 | 238 | 1905 | 5    | 25.0 |
| PRoFESS   | Placebo   | AE              | History/diagnosis     | ARBs            | Placebo       | 112 | 7108 | 136 | 7103 | 4.41 | 6.9  |

#### Diagnosis subgroups

|                                                                                                              |      |                     |
|--------------------------------------------------------------------------------------------------------------|------|---------------------|
| Overall estimation (n trials=19)                                                                             | 15.7 | 0.89 (0.84 to 0.95) |
| Subgroup 1: Both outcome and baseline diabetes ascertained using at least one laboratory test (n trials=5) * | 19.8 | 0.64 (0.56 to 0.73) |
| Subgroup 2: Outcome ascertained using at least one laboratory test (n trials=7) †                            | 18.3 | 0.63 (0.55 to 0.72) |
| Subgroup 3: Outcome reported as AE (n trials =10) ‡                                                          | 11.3 | 0.92 (0.84 to 1.00) |
| Subgroup 4: Outcome ascertained using at least one laboratory test or ICD codes-self report (n trials =9) §  | 18.1 | 0.87 (0.79 to 0.95) |

Drug-drug: drug-drug comparison trials; Placebo: Placebo-controlled trial; ICD: International Classification of Diseases code; AE: adverse event, GTT: Glucose Tolerance Test; FPG: fasting plasma glucose test; History: history of type 2 diabetes; diagnosis: diagnosis of type 2 diabetes by clinical staff; BP difference: systolic blood pressure difference; Incidence rate: overall incidence rate per 1000 person-years of follow-up, CCBs: calcium channel-blockers; ACEIs: angiotensin-converting enzyme inhibitors; ARBs: angiotensin II receptor blockers; BBs: beta blockers; HR and 95% CI: hazard ratio and 95% confidence intervals standardized for 5 mmHg reduction in systolic blood pressure

\* Included trials: ALLHAT, ASCOT-BPLA, CAPPP, HIJCREATE, TRANSCEND

† Included trials: ALLHAT, ASCOT-BPLA, CAPPP, HIJCREATE, TRANSCEND, ONTARGET, STOP2

‡ Included trials: ACTIVE I, ANBP, ANBP2, COLM, COPE, MOSES, NORDIL, PEACE, PROGRESS, PRoFESS

§ Included trials: ALLHAT, ASCOT-BPLA, CAPPP, HIJCREATE, TRANSCEND, ONTARGET, STOP2, SYSTEUR, CASEJ

Table S6. Post-hoc one-stage Cox proportional hazards model included random effects terms and adjusted for multiple potential confounders.

| Model number                                                              | Sensitivity analysis                                                                                                                      | HR (95% CI)         |
|---------------------------------------------------------------------------|-------------------------------------------------------------------------------------------------------------------------------------------|---------------------|
| #1                                                                        | <b>Main model (fixed effect)</b>                                                                                                          | 0.89 (0.84 to 0.95) |
| <b>Main model with different adjustment levels for baseline variables</b> |                                                                                                                                           |                     |
| #2                                                                        | Adjusted for age and sex                                                                                                                  | 0.89 (0.84 to 0.95) |
| #3                                                                        | Adjusted for variables in model #2 + SBP at baseline                                                                                      | 0.89 (0.84 to 0.95) |
| #4                                                                        | Adjusted for variables in model #3 + BMI                                                                                                  | 0.90 (0.84 to 0.96) |
| #5                                                                        | Adjusted for variables in model #4 + Comorbidities                                                                                        | 0.88 (0.82 to 0.95) |
| #6                                                                        | Adjusted for variables in model #5 + previous use of non-study antihypertensive medications                                               | 0.88 (0.81 to 0.94) |
| #7                                                                        | Adjusted for variables in model #6 + previous use of non-study medications (anti-platelet drug, anticoagulants, lipid-lowering treatment) | 0.86 (0.75 to 1.00) |
| <b>Post-hoc sensitivity analysis model (random effect)</b>                |                                                                                                                                           |                     |
| #8                                                                        | Age as random effect term                                                                                                                 | 0.91 (0.86 to 0.97) |
| #9                                                                        | Sex as random effect term                                                                                                                 | 0.91 (0.86 to 0.97) |
| #10                                                                       | SBP categories at baseline as random effect term                                                                                          | 0.91 (0.86 to 0.97) |
| #11                                                                       | BMI categories as random effect term                                                                                                      | 0.92 (0.86 to 0.98) |
| #12                                                                       | Comorbidities as random effect term                                                                                                       | 0.88 (0.83 to 0.94) |
| #13                                                                       | Previous use of non-study antihypertensive medications as random effect term                                                              | 0.93 (0.86 to 0.99) |
| #14                                                                       | Previous use of non-study medications (anti-platelet drug, anticoagulants, lipid-lowering treatment) as random effect term                | 0.88 (0.80 to 0.97) |

SBP: systolic blood pressure, HR: hazard ratio, CI: confidence intervals

Table S7. Structure of data used for Bayesian network meta-analysis.

| Trial      | Treatment              | Log odds ratio | Standard error |
|------------|------------------------|----------------|----------------|
| ACTIVE I   | ARBs                   | -0.087282      | 0.1019051      |
| ACTIVE I   | Placebo                | Ref            | Ref            |
| ALLHAT     | ACEIs                  | Ref            | 0.042723       |
| ALLHAT     | Alpha-blockers         | -0.236321      | 0.0635346      |
| ALLHAT     | CCBs                   | 0.180828       | 0.0586936      |
| ALLHAT     | Diuretics              | 0.34054        | 0.0516992      |
| ANBP       | Diuretics              | 0.065873       | 0.3867451      |
| ANBP       | Placebo                | Ref            | Ref            |
| ANBP2      | Diuretics              | 0.290631       | 0.1127574      |
| ANBP2      | ACEIs                  | Ref            | Ref            |
| ASCOT-BPLA | BBs                    | Ref            | Ref            |
| ASCOT-BPLA | CCBs                   | -0.379775      | 0.0578355      |
| CAPPP      | BBs and diuretics      | 0.119263       | 0.0775375      |
| CAPPP      | ACEIs                  | Ref            | Ref            |
| CASEJ      | ARBs                   | Ref            | Ref            |
| CASEJ      | CCBs                   | 0.456953       | 0.2117247      |
| COLM       | Diuretics              | 0.306425       | 0.3983511      |
| COLM       | CCBs                   | Ref            | Ref            |
| COPE       | ARBs                   | Ref            | 0.2260231      |
| COPE       | BBs                    | 0.657745       | 0.2814929      |
| COPE       | Diuretics              | 0.503684       | 0.2888821      |
| HOPE       | ACEIs                  | -0.421015      | 0.1303484      |
| HOPE       | Placebo                | Ref            | Ref            |
| INSIGHT    | Diuretics              | 0.272714       | 0.1178478      |
| INSIGHT    | CCBs                   | Ref            | Ref            |
| MOSES      | ARBs                   | Ref            | Ref            |
| MOSES      | CCBs                   | -0.455182      | 0.359962       |
| NORDIL     | BBs and diuretics      | 0.141555       | 0.095181       |
| NORDIL     | CCBs                   | Ref            | Ref            |
| ONTARGET   | ACEIs                  | Ref            | 0.0541296      |
| ONTARGET   | ARBs or ACEIs          | -0.104219      | 0.0789173      |
| ONTARGET   | ARBs                   | 0.119676       | 0.0751049      |
| PEACE      | ACEIs                  | -0.18624       | 0.0784146      |
| PEACE      | Placebo                | Ref            | Ref            |
| PROGRESS   | ACEIs and/or Diuretics | -0.062958      | 0.1568992      |
| PROGRESS   | Placebo                | Ref            | Ref            |
| STOP2      | ACEIs                  | Ref            | 0.1036344      |
| STOP2      | BBs and/or Diuretics   | -0.005437      | 0.1469285      |
| STOP2      | CCBs                   | -0.052368      | 0.1484213      |
| SYSTEUR    | CCBs                   | 0.28115        | 0.1521744      |
| SYSTEUR    | Placebo                | Ref            | Ref            |
| TRANSCEND  | ARBs                   | -0.16907       | 0.1003129      |
| TRANSCEND  | Placebo                | Ref            | Ref            |
| VALUE      | ARBs                   | Ref            | Ref            |
| VALUE      | CCBs                   | 0.256895       | 0.0555286      |
| PRoFESS    | ARBs                   | -0.19831       | 0.1287212      |
| PRoFESS    | Placebo                | Ref            | Ref            |

Ref: reference category for calculation of odds ratio  
Analysis comparing the effects by drug classes were not standardized for the intensity of blood pressure reduction. This was to account for potential variations in blood pressure-lowering efficacy, tolerability, or non-blood pressure-mediated effects of the different drug classes.  
CCBs: calcium channel-blockers; ACEIs: angiotensin-converting enzyme inhibitors; ARBs: angiotensin II receptor blockers; BBs: beta-blockers  
ACTIVE I: Atrial Fibrillation Clopidogrel Trial with Irbesartan for Prevention of Vascular Events; ALLHAT: Antihypertensive and Lipid Lowering Treatment to Prevent Heart Attack Trial; ANBP: Australian National Blood Pressure Study; ANBP2: Second Australian National Blood Pressure Study; ASCOT-BPLA: Anglo-Scandinavian Cardiac Outcomes Trial-Blood Pressure Lowering Arm; CAPPP: Captopril Prevention Project; CASE-J: Candesartan Antihypertensive Survival Evaluation in Japan Trial; COLM: Combination of OLMesartan study; COPE: Combination Therapy of Hypertension to Prevent Cardiovascular Events; HIJ-CREATE: Heart Institute of Japan Candesartan Randomized Trial for Evaluation in Coronary Artery Disease; HOPE: Heart Outcomes Prevention Evaluation; INSIGHT: International Nifedipine GITS study; Intervention as a Goal in Hypertension Treatment; MOSES: Morbidity and Mortality After Stroke, Eprosartan Compared With Nitrendipine for Secondary Prevention; NORDIL: Nordic Diltiazem Study; ONTARGET: Ongoing Telmisartan Alone and in Combination with Ramipril Global Endpoint Trial; PEACE: Prevention of Events with Angiotensin-Converting Enzyme Inhibition; PRoFESS: Prevention Regimen for Effectively Avoiding Second Strokes; PROGRESS: Perindopril Protection Against Recurrent Stroke Study; STOP Hypertension-2: Swedish Trial in Old Patients with Hypertension-2; Syst-Eur: Systolic Hypertension in Europe; TRANSCEND: Telmisartan Randomized Assessment Study in ACE Intolerant Subjects with Cardiovascular Disease; VALUE: Valsartan Antihypertensive Long-term Use Evaluation



## Supplementary Figures

Figure S1. Trial selection flowchart.

Adapted from the flowchart of the main protocol <sup>76</sup>

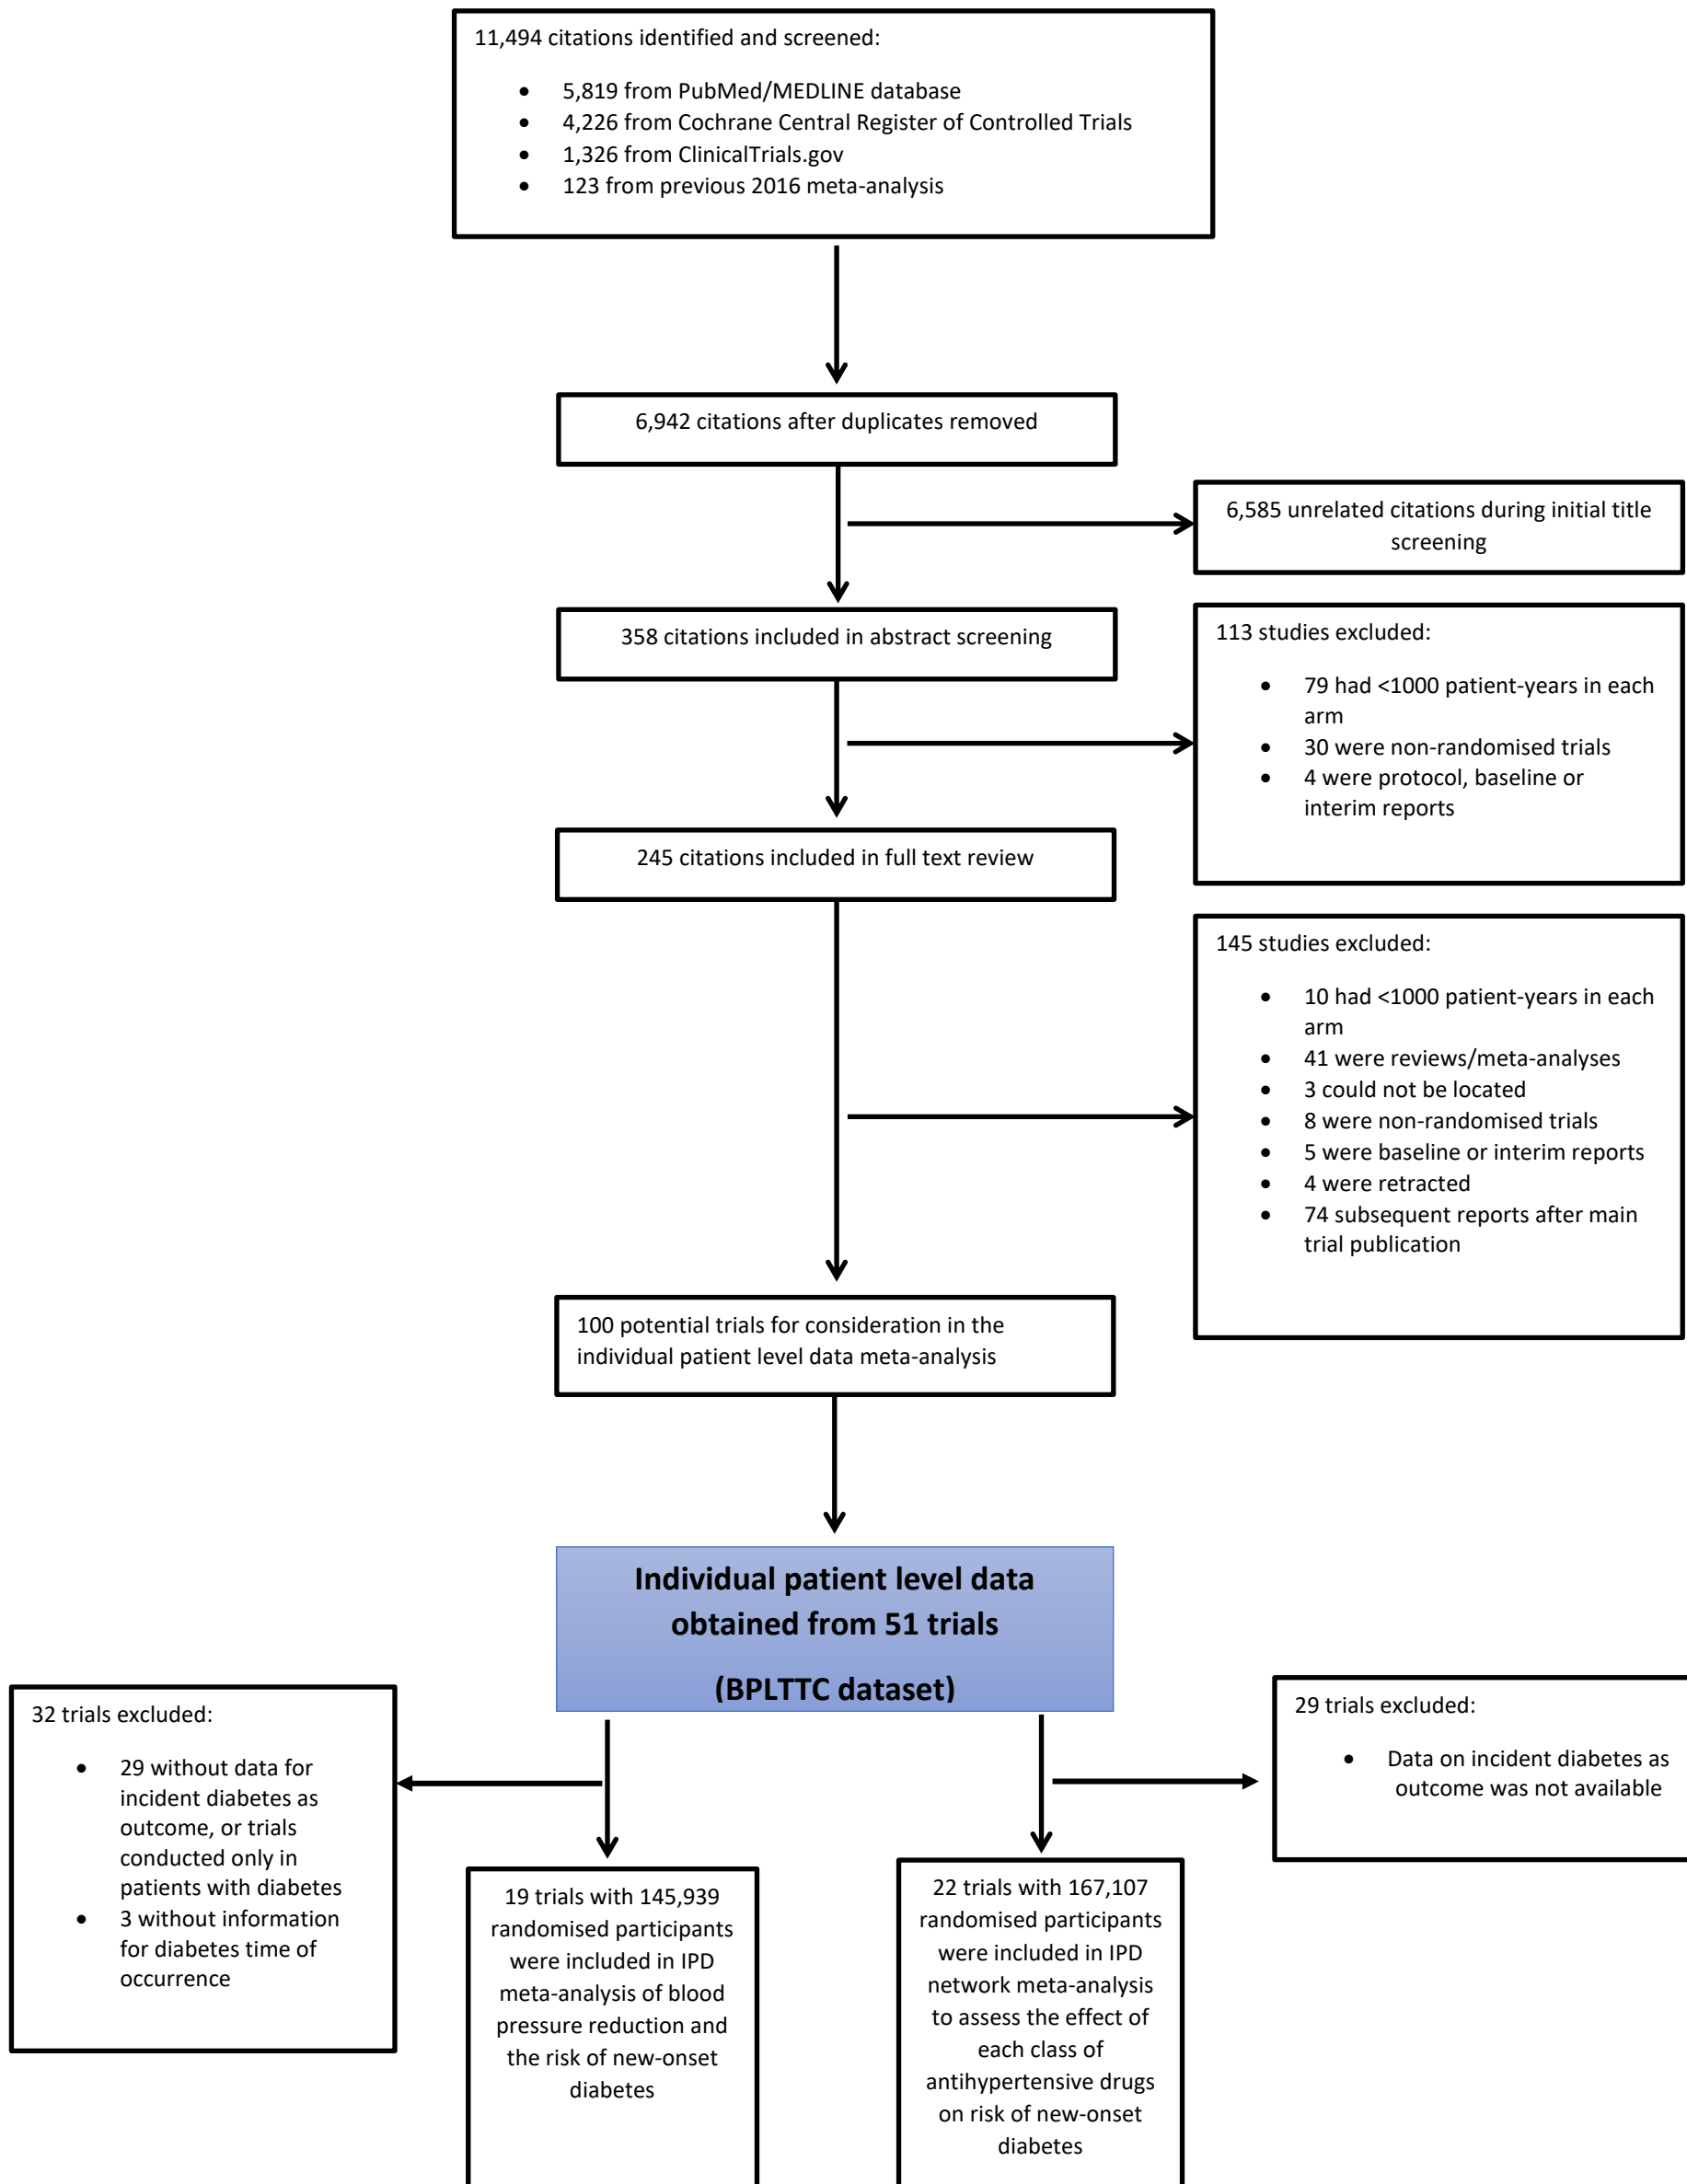

Figure S2. The genetic variant selection workflow for systolic blood pressure.

LD: linkage disequilibrium; GWAS: genome-wide association study

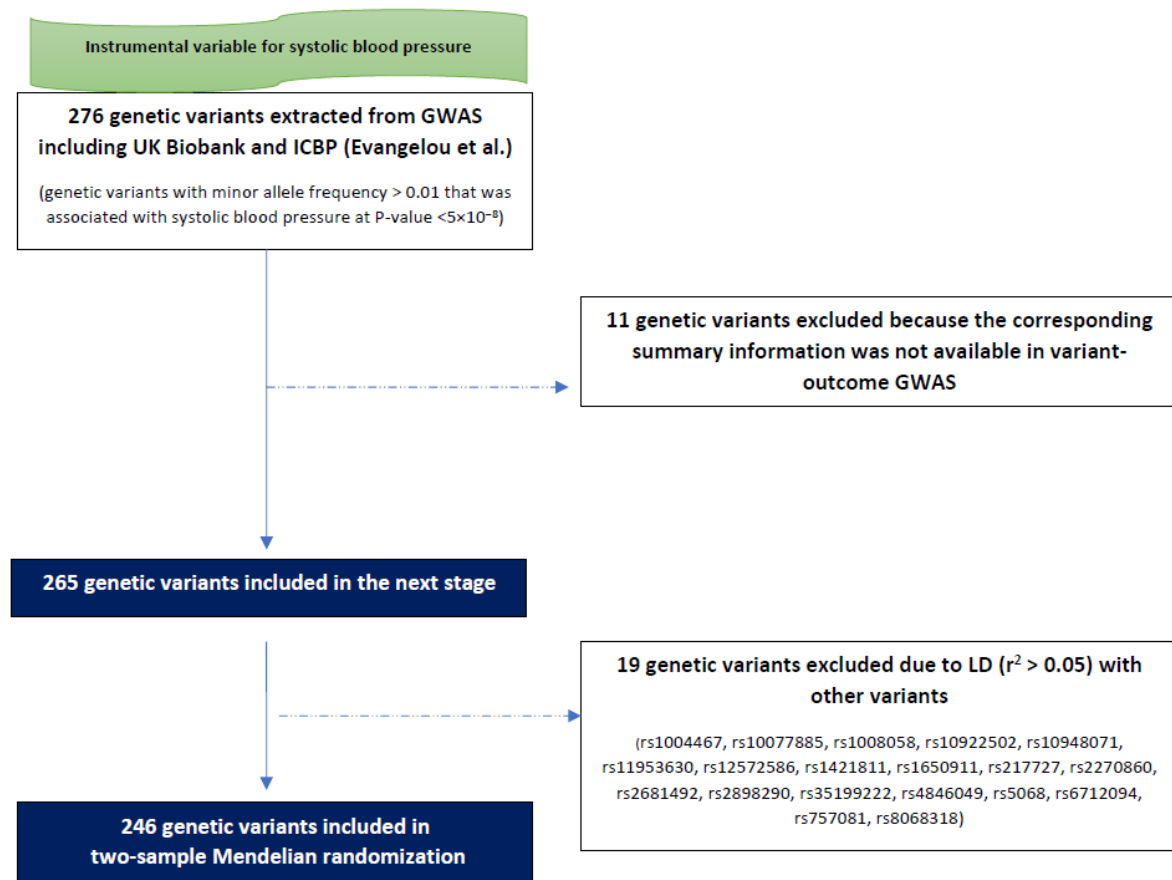

Figure S3. Forest plot showing the effect of systolic blood pressure lowering per se on the risk of new-onset type 2 diabetes, overall and separately for each trial.

The estimated heterogeneity indexes were  $I^2 = 86\%$  and  $\tau^2 = 0.11$ . The hazard ratio (HR) is standardised for blood pressure reduction between included trials. BP difference: systolic blood pressure difference, ACEI: angiotensin converting enzyme inhibitors, ARB: angiotensin II receptor blockers, BB: beta-blockers, CI: confidence intervals, ICD: international classification of diseases diagnosis codes

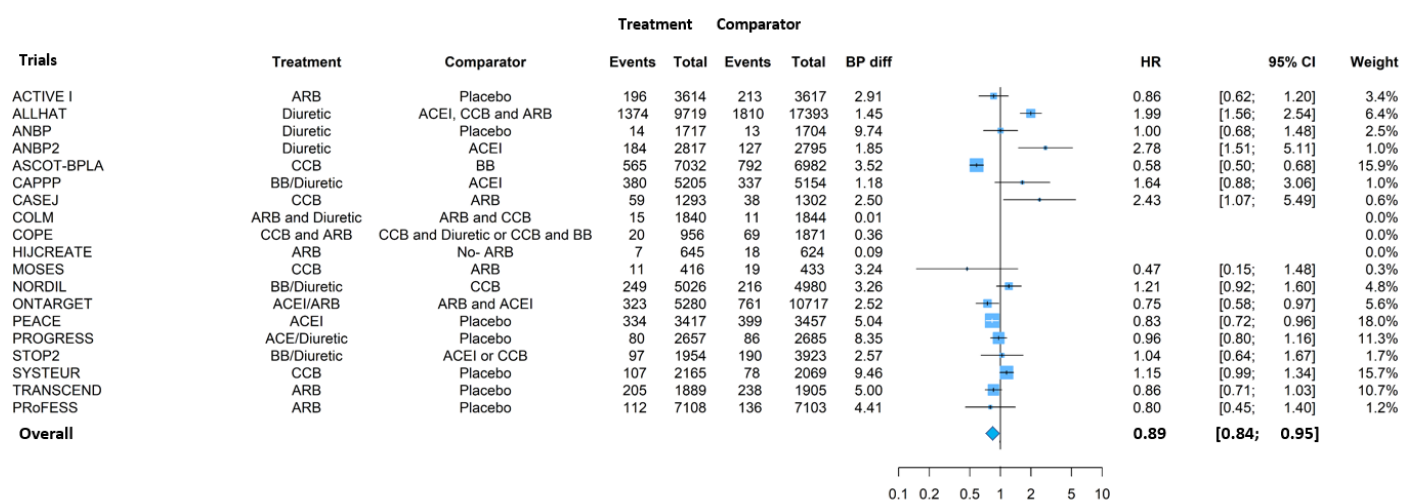

Figure S4. Funnel plot for assessment of publication (acquisition) bias on the effect of blood pressure reduction and risk of new-onset type 2 diabetes.

Egger's regression test: T statistics = - 0.2, df = 17, bias coefficient -0.22, standard error 1.09, p-value = 0.83.

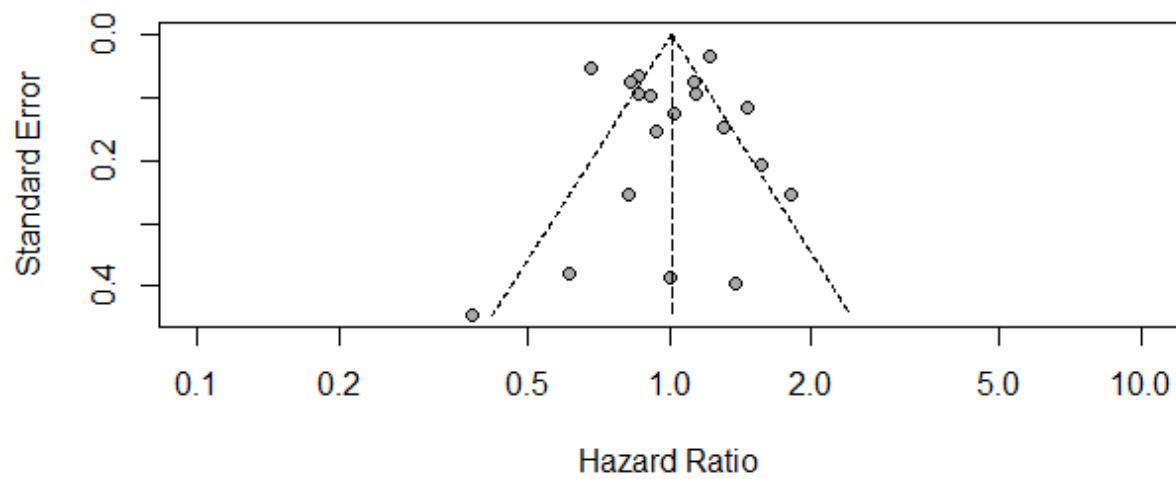

Figure S5. Absolute risk reduction for the effect of each major antihypertensive drug class on the risk of new-onset type 2 diabetes.

Absolute risk reduction (ARR) was estimated using a Poisson regression model with an identity link. The unit is absolute risk difference between each drug class versus placebo (or treatment versus comparator groups for overall effect). ARR for overall estimation was -0.0022 (95% CI -0.0049 to 0.0005). BP: systolic blood pressure, ACEIs: angiotensin-converting enzyme inhibitors, ARBs: angiotensin II receptor blockers, CI: confidence intervals.

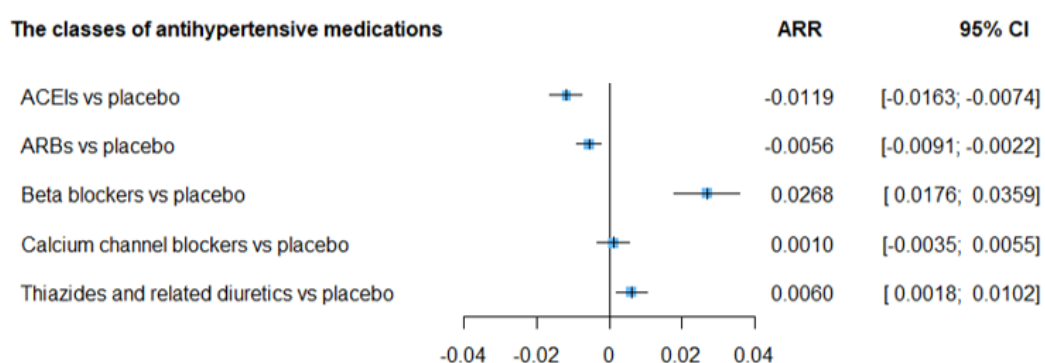

Figure S6. Effect of systolic blood pressure lowering per se on the risk of new-onset type 2 diabete.

In IPD meta-analysis, the effect size was standardised for blood pressure reduction between included trials.

Blue squares represent the point estimation and size of squares is the same. The horizontal solid lines represent 95% confidence intervals. Relative risk: indicates hazard ratio in IPD meta-analysis of randomised controlled trials and odds ratio in Mendelian randomisation, IPD: individual participant data, RCT: randomised controlled trial, CI: confidence interval.

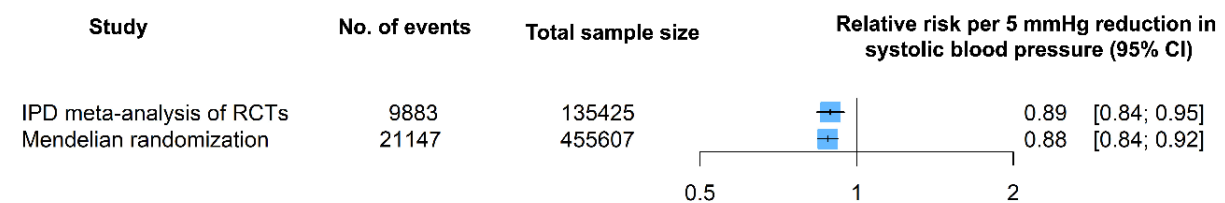

Each 5 mmHg genetically-influenced lower systolic blood pressure was associated with a 12% lower risk of type 2 diabetes (OR: 0.88 [95% CI 0.84 to 0.92]). The positive control analysis showed strong associations for the same magnitude of systolic blood pressure difference and risk of coronary heart disease (OR: 0.87 [95% CI 0.84 to 0.90]), myocardial infarction (OR: 0.90 [95% CI 0.87 to 0.93]), and ischemic stroke (OR: 0.85 [95% CI 0.80 to 0.91]), further supporting the validity of our instrumental variable (**Figure S7**). The Mendelian randomisation regression slopes are shown in **Figures S8 and S9**. Overall, estimated ORs based on different methods were similar in magnitude and direction, suggesting that there was no material effect of pleiotropy on the causal estimation (**Figure S10**). In the leave-one-out analysis, we found that no single genetic variant was noticeably driving the overall effect of systolic blood pressure on type 2 diabetes (**Figure 11**). Consistent results from the sensitivity analyses also support our main findings (**Figures S12 -S14**).

Figure S7. Mendelian randomisation estimates for the association between genetically predicted 5-mmHg systolic blood pressure reduction and diabetes as the main outcome, and coronary heart disease, myocardial infarction, and ischemic stroke as positive control outcomes.

Blue squares represent the point estimation and size of squares is the same. The horizontal solid lines represent 95% confidence intervals. Cases and controls: number of cases and controls in genome-wide association studies. Odds ratio (OR): estimated using the inverse-variance weighted method

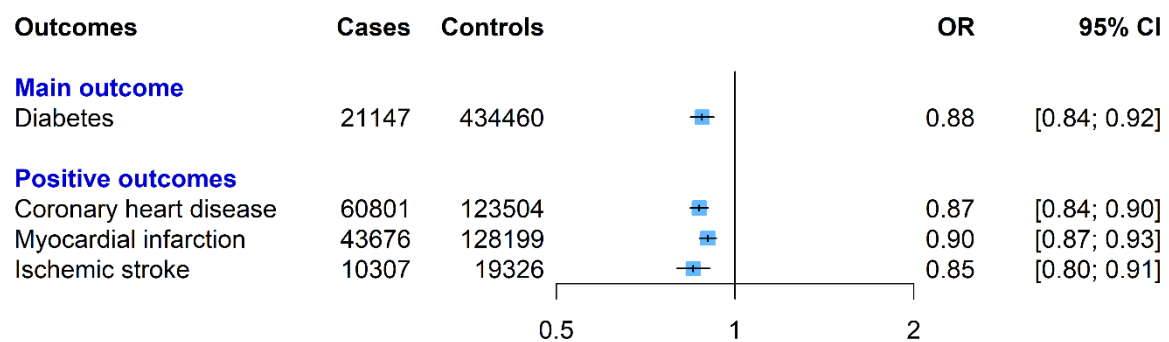

Figure S8. Scatter plot of genetic variant-outcome associations versus variant-exposure associations for the association between systolic blood pressure and risk of type 2 diabetes.

Circles indicate marginal genetic associations with systolic blood pressure and risk of diabetes for each variant. Error bars indicate 95% CIs. SNP: single-nucleotide polymorphism

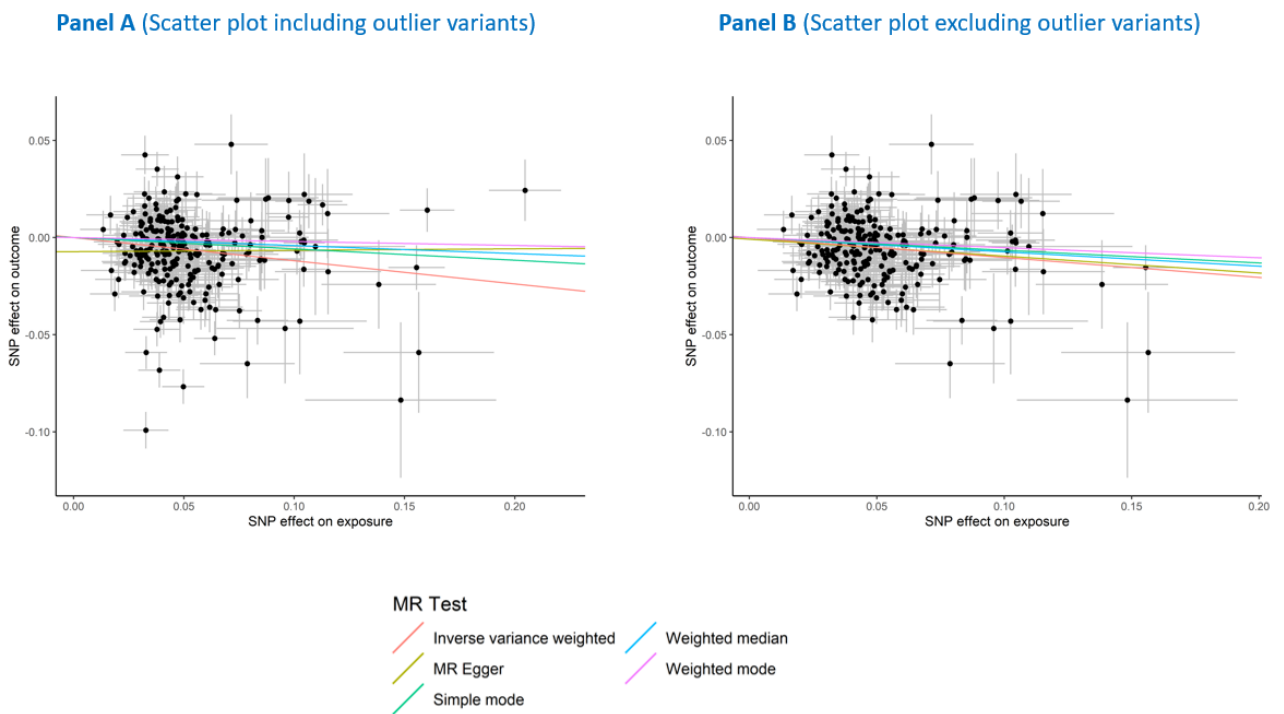



Figure S9. Funnel plot of variants, showing each variant causal estimate against instrument strength.

$\beta$ : The causal effect of the exposure on the outcome, SE: standard error

Panel A (Funnel plot including outlier variants)

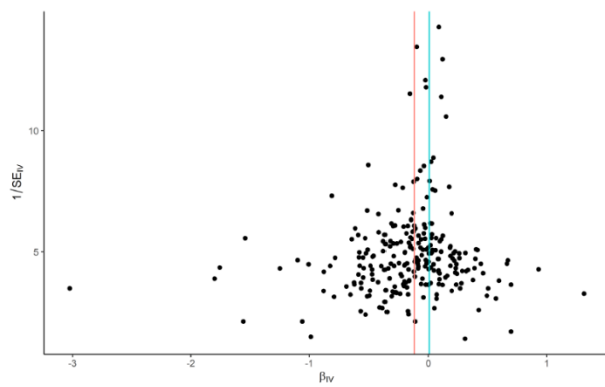

Panel B (Funnel plot excluding outlier variants)

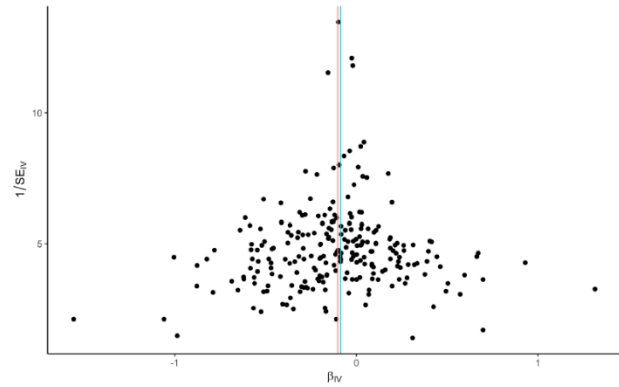

MR Method  
Inverse variance weighted  
MR Egger

Figure S10. The association between systolic blood pressure and risk of diabetes estimated by random-effect inverse variance weighted and applied various sensitivity analysis methods of two-sample Mendelian randomisation, before (main analysis) and after excluding outlier variants (sensitivity analysis).

Blue squares represent the point estimation and size of squares is the same. The horizontal solid lines represent 95% confidence intervals. The MBE method was implemented using both simple and weighted options with bandwidth  $\phi = 1$  under the no measurement error (NOME) assumption. The following outlier variants excluded based on Cook's distance measure over  $4/n$ , where  $n$  is the number of included genetic variants: rs10274928, rs11191548, rs12454712, rs1446468, rs17249754, rs17477177, rs2972146, rs34072724, rs4841569, rs5219, rs6712203, rs9368222

**Panel A** (Analyses including outlier variants)

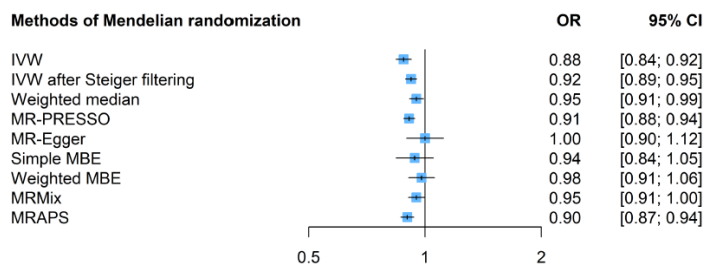

**Panel B** (Analyses excluding outlier variants)

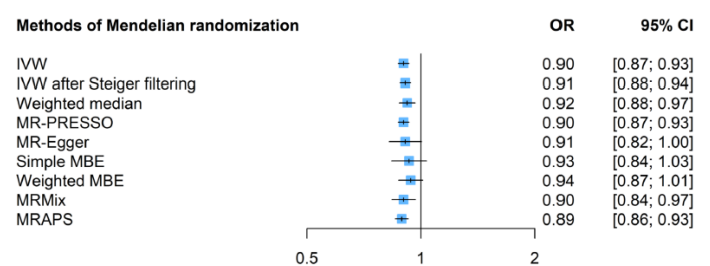

Figure S11. Leave-one-out plot to assess if a single variant is driving the association between systolic blood pressure and diabetes.

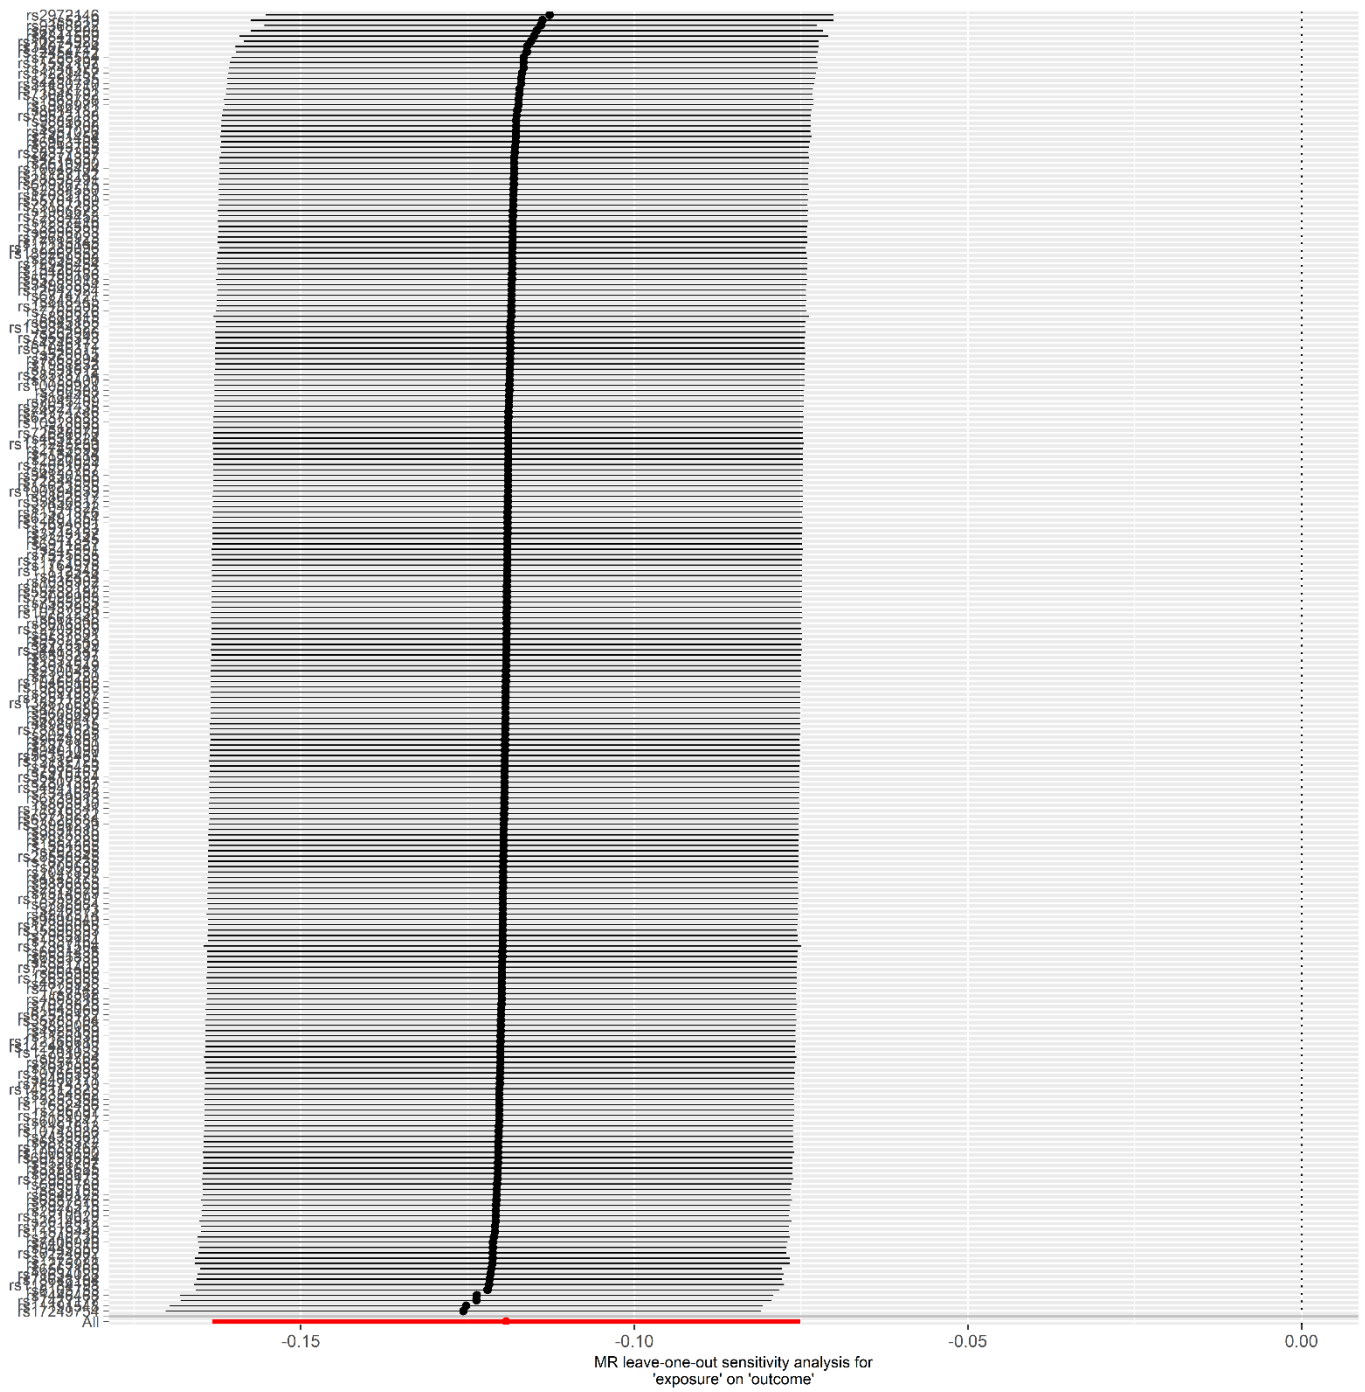

Figure S12. Multivariable Mendelian randomisation results unadjusted and adjusted for the anthropometric measures to check the possibility of collider bias in association between systolic blood pressure and diabetes.

Blue squares represent the point estimation and size of squares is the same. The horizontal solid lines represent 95% confidence intervals. In conventional Mendelian randomisation analysis, we used the summary statistics not adjusted for body mass index or other anthropometric measures. Multivariable Mendelian randomisation adjusted for body mass index, waist circumference, hip circumference, and fat percentage; OR: odds ratio per 5 mmHg lower systolic blood pressure, IVW: inverse-variance weighted

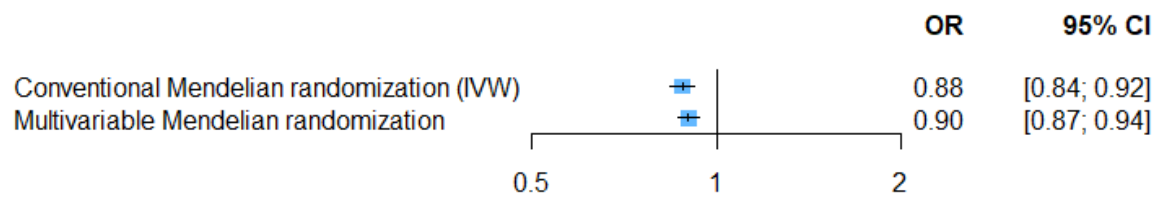

Figure S13. Sensitivity analysis to assess the impact of using overlap dataset for the discovery of candidate instrumental variable for exposure.

The below forest plot shows the association between systolic blood pressure and risk of diabetes estimated by random-effect inverse variance weighted and applied various sensitivity analyses. The instrumental variable (IV)-exposure estimations were the same as the main analysis, but IV-outcome summary estimations were extracted from stage 1 of the DIAbetes Genetics Replication And Meta-analysis (DIAGRAM) Consortium, which has no overlap with the UK Biobank. Blue squares represent the point estimation and size of squares is the same. The horizontal solid lines represent 95% confidence intervals. OR: odds ratio per 5- mmHg lower systolic blood pressure

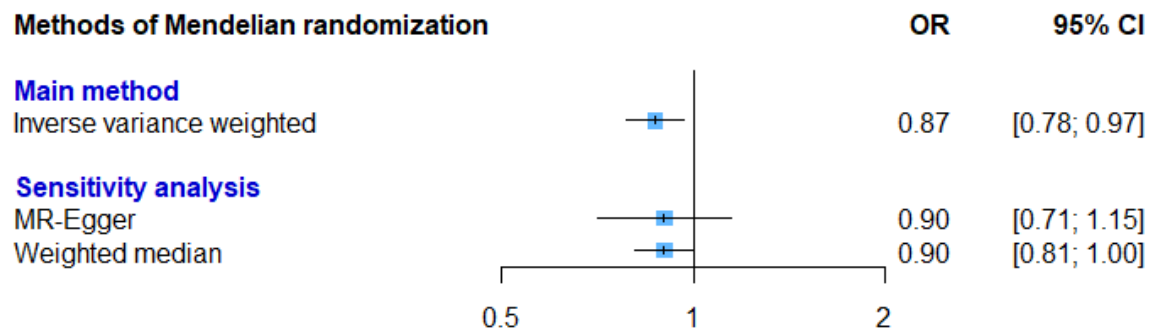

Figure S14. The association between systolic blood pressure and risk of diabetes replicated by one-sample Mendelian randomisation.

The result of the main one-sample analysis, in which genetic variants were the same as in the two-sample Mendelian randomisation, was similar to the main findings (OR 0.87 [95% CI 0.84 to 0.90]). In addition to this, we have conducted a new one-sample Mendelian randomisation. In this sensitivity analysis, to build a new genetic risk score, we selected 370 genetic variants from the final International Consortium for Blood Pressure (ICBP) GWAS dataset included 77 cohorts (n = 299,024, no overlap with UK Biobank). The result of this sensitivity analysis using a new built genetic risk score was in line with the previous one-sample analysis (OR 0.88 [95% CI 0.85 to 0.92]).

Blue squares represent the point estimation and size of squares is the same. The horizontal solid lines represent 95% confidence intervals. OR: odds ratio per 5 mmHg lower systolic blood pressure

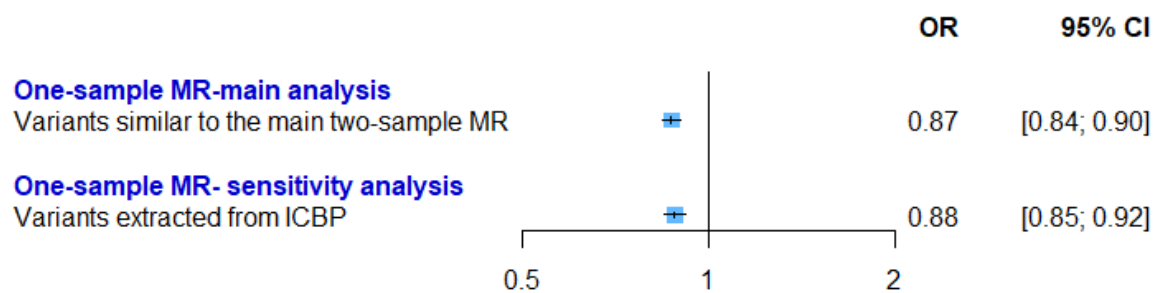

Figure S15. Association of genetically influenced systolic blood pressure reduction overall and for each major class of antihypertensive medications, with type 2 diabetes as the main outcome, and coronary heart disease as the positive control.

Blue squares represent the point estimation and size of squares is the same. The horizontal solid lines represent 95% confidence intervals. Odds ratio: estimated using the inverse-variance weighted method. Effect of blood pressure-lowering class of drugs estimated using genetic variants in genes encode drug targets. ACEIs/ARBs: angiotensin-converting enzyme inhibitors/ angiotensin receptor blockers. CI: confidence interval

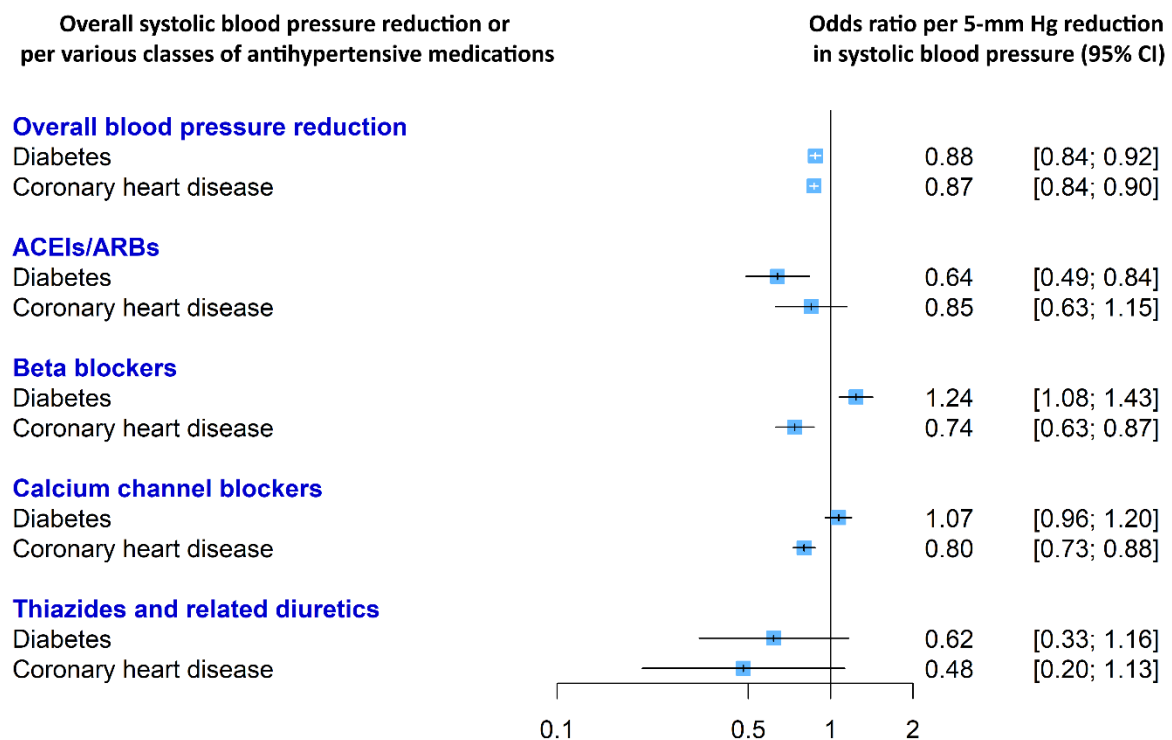

In the positive control analysis, systolic blood pressure reduction predicted through genetic variants for ACEIs/ARBs, beta-blockers and CCBs were associated with a lower risk of coronary heart disease as an established evidence-based target for preventive blood pressure-lowering treatment, supporting the validity of the gene-based analysis. For type 2 diabetes, we found a decrease in the risk with ACEIs/ARBs, null effect with CCBs and increased risk with beta-blockers. The genetic evidence for thiazide diuretics did not provide adequate statistical power for replication.





## References

- 1 Evangelou E, Warren HR, Mosen-Ansorena D, *et al.* Genetic analysis of over 1 million people identifies 535 new loci associated with blood pressure traits. *Nature Genetics* 2018; **50**: 1412–25.
- 2 Xue A, Wu YY, Zhu Z, *et al.* Genome-wide association analyses identify 143 risk variants and putative regulatory mechanisms for type 2 diabetes. *Nature Communications* 2018; **9**: 2941.
- 3 Hartwig FP, Davies NM, Hemani G, Davey Smith G. Two-sample Mendelian randomization: avoiding the downsides of a powerful, widely applicable but potentially fallible technique. *International journal of epidemiology* 2016; **45**: 1717–26.
- 4 Ehret GB, Munroe PB, Rice KM, *et al.* Genetic variants in novel pathways influence blood pressure and cardiovascular disease risk. *Nature* 2011; **478**: 103–9.
- 5 Fortier I, Raina P, Van den Heuvel ER, *et al.* Maelstrom Research guidelines for rigorous retrospective data harmonization. *International Journal of Epidemiology* 2016; **46**: dyw075.
- 6 Hartwig FP, Smith GD, Bowden J. Robust inference in summary data Mendelian randomization via the zero modal pleiotropy assumption. *International Journal of Epidemiology* 2017; **46**: 1985–98.
- 7 Hemani G, Bowden J, Davey Smith G. Evaluating the potential role of pleiotropy in Mendelian randomization studies. *Human molecular genetics*. 2018; **27**: R195–208.
- 8 Bowden J, Davey Smith G, Haycock PC, Burgess S. Consistent Estimation in Mendelian Randomization with Some Invalid Instruments Using a Weighted Median Estimator. *Genetic epidemiology* 2016; **40**: 304–14.
- 9 Verbanck M, Chen C-Y, Neale B, Do R. Detection of widespread horizontal pleiotropy in causal relationships inferred from Mendelian randomization between complex traits and diseases. *Nature Genetics* 2018; **50**: 693–8.
- 10 Bowden J, Davey Smith G, Burgess S. Mendelian randomization with invalid instruments: effect estimation and bias detection through Egger regression. *International Journal of Epidemiology* 2015; **44**: 512–25.
- 11 Burgess S, Thompson SG. Interpreting findings from Mendelian randomization using the MR-Egger method. *European Journal of Epidemiology* 2017; **32**: 377–89.
- 12 Cook RD. Detection of Influential Observation in Linear Regression. *Technometrics* 1977; **19**: 15.
- 13 Zhao Q, Wang J, Hemani G, Bowden J, Small DS. Statistical inference in two-sample summary-data Mendelian randomization using robust adjusted profile score. *Annals of Statistics* 2018; **48**: 1742–69.
- 14 Qi G, Chatterjee N. Mendelian randomization analysis using mixture models for robust and efficient estimation of causal effects. *Nature Communications* 2019; **10**: 1–10.
- 15 Hemani G, Tilling K, Davey Smith G. Orienting the causal relationship between imprecisely measured traits using GWAS summary data. *PLoS Genetics* 2017; **13**. DOI:10.1371/journal.pgen.1007081.
- 16 Burgess S, Bowden J, Fall T, Ingelsson E, Thompson SG. Sensitivity Analyses for Robust Causal Inference from Mendelian Randomization Analyses with Multiple Genetic Variants.

*Epidemiology* 2017; **28**: 30–42.

- 17 Hemani G, Zheng J, Elsworth B, *et al.* The MR-base platform supports systematic causal inference across the human phenome. *eLife* 2018; **7**. DOI:10.7554/eLife.34408.
- 18 Yavorska OO, Burgess S. MendelianRandomization: An R package for performing Mendelian randomization analyses using summarized data. *International Journal of Epidemiology* 2017; **46**: 1734–9.
- 19 Neale B. Rapid GWAS of thousands of phenotypes in the UK Biobank 2020. 2020. <http://www.nealelab.is/blog/2017/7/19/rapid-gwas-of-thousands-of-phenotypes-for-337000-samples-in-the-uk-biobank> (accessed April 19, 2020).
- 20 Sanderson E, Davey Smith G, Windmeijer F, Bowden J. An examination of multivariable Mendelian randomization in the single-sample and two-sample summary data settings. *International Journal of Epidemiology* 2019; **48**: 713–27.
- 21 Burgess S, Thompson SG. Multivariable Mendelian Randomization: The Use of Pleiotropic Genetic Variants to Estimate Causal Effects. *American Journal of Epidemiology* 2015; **181**: 251–60.
- 22 Nikpay M, Goel A, Won HH, *et al.* A comprehensive 1000 Genomes-based genome-wide association meta-analysis of coronary artery disease. *Nature Genetics* 2015; **47**: 1121–30.
- 23 Malik R, Traylor M, Pulit SL, *et al.* Low-frequency and common genetic variation in ischemic stroke. *Neurology* 2016; **86**: 1217–26.
- 24 Morris AP, Voight BF, Teslovich TM, *et al.* Large-scale association analysis provides insights into the genetic architecture and pathophysiology of type 2 diabetes. *Nature Genetics* 2012; **44**: 981–90.
- 25 Sudlow C, Gallacher J, Allen N, *et al.* UK biobank: an open access resource for identifying the causes of a wide range of complex diseases of middle and old age. *PLoS medicine* 2015; **12**: e1001779.
- 26 UK Biobank Coordinating Centre. UK Biobank: Protocol for a large-scale prospective epidemiological resource UK Biobank Coordinating Centre. Design. 2007; **06**: 1–112.
- 27 Bycroft C, Freeman C, Petkova D, *et al.* The UK Biobank resource with deep phenotyping and genomic data. *Nature* 2018; **562**: 203–9.
- 28 Nazarzadeh M, Pinho-Gomes AC, Smith Byrne K, *et al.* Systolic Blood Pressure and Risk of Valvular Heart Disease: A Mendelian Randomization Study. *JAMA Cardiology* 2019; **4**: 788–95.
- 29 Lewis CJ, Gong H, Brown MJ, Harding SE. Overexpression of  $\beta$  1-adrenoceptors in adult rat ventricular myocytes enhances CGP 12177A cardiostimulation: Implications for ‘putative’  $\beta$  4-adrenoceptor pharmacology. *British Journal of Pharmacology* 2004; **141**: 813–24.
- 30 Nazarzadeh M, Pinho-Gomes AC, Bidel Z, *et al.* Genetic susceptibility, elevated blood pressure, and risk of atrial fibrillation: a Mendelian randomization study. *Genome Medicine* 2021; **13**: 38.
- 31 Gill D, Georgakis MK, Koskeridis F, *et al.* Use of Genetic Variants Related to Antihypertensive Drugs to Inform on Efficacy and Side Effects. *Circulation* 2019; **140**: 270–9.
- 32 Walker VM, Kehoe PG, Martin RM, Davies NM. Repurposing antihypertensive drugs for the prevention of Alzheimer’s disease: a Mendelian randomization study. *International Journal of Epidemiology* 2019; published online July 23. DOI:10.1093/ije/dyz155.

- 33 Law MR, Morris JK, Wald NJ. Use of blood pressure lowering drugs in the prevention of cardiovascular disease: Meta-analysis of 147 randomised trials in the context of expectations from prospective epidemiological studies. *BMJ (Online)* 2009; **338**: 1245.
- 34 Jamerson K, Weber MA, Bakris GL, *et al.* Benazepril plus Amlodipine or Hydrochlorothiazide for Hypertension in High-Risk Patients. *New England Journal of Medicine* 2008; **359**: 2417–28.
- 35 Furberg CD, Wright JT, Davis BR, *et al.* Major outcomes in high-risk hypertensive patients randomized to angiotensin-converting enzyme inhibitor or calcium channel blocker vs diuretic: The antihypertensive and lipid-lowering treatment to prevent heart attack trial (ALLHAT). *Journal of the American Medical Association* 2002; **288**: 2981–97.
- 36 Ettehad D, Emdin CA, Kiran A, *et al.* Blood pressure lowering for prevention of cardiovascular disease and death: a systematic review and meta-analysis. *Lancet (London, England)* 2016; **387**: 957–67.
- 37 Gill D, Georgakis MK, Koskeridis F, *et al.* Use of Genetic Variants Related to Antihypertensive Drugs to Inform on Efficacy and Side Effects. *Circulation* 2019; **140**: 270–9.
- 38 Walker VM, Kehoe PG, Martin RM, Davies NM. Repurposing antihypertensive drugs for the prevention of Alzheimer’s disease: a Mendelian randomization study. *International Journal of Epidemiology* 2019; : 1–9.
- 39 Emdin CA, Anderson SG, Woodward M, Rahimi K. Usual Blood Pressure and Risk of New-Onset Diabetes Evidence from 4.1 Million Adults and a Meta-Analysis of Prospective Studies. *Journal of the American College of Cardiology* 2015; **66**: 1552–62.
- 40 Roumie CL, Hung AM, Russell GB, *et al.* Blood Pressure control and the association with Diabetes Incidence: Results from the SPRINT Randomized trial. *Hypertension* 2019; **75**: 331–8.
- 41 Sun D, Zhou T, Heianza Y, *et al.* Type 2 Diabetes and Hypertension. *Circulation research* 2019; **124**: 930–7.
- 42 Aikens RC, Zhao W, Saleheen D, *et al.* Systolic blood pressure and risk of type 2 diabetes: A mendelian randomization study. *Diabetes* 2017; **66**: 543–50.
- 43 Zhu Z, Zheng Z, Zhang F, *et al.* Causal associations between risk factors and common diseases inferred from GWAS summary data. *Nature Communications* 2018; **9**: 224–224.
- 44 Gress TW, Nieto FJ, Shahar E, Wofford MR, Brancati FL. Hypertension and Antihypertensive Therapy as Risk Factors for Type 2 Diabetes Mellitus. *New England Journal of Medicine* 2000; **342**: 905–12.
- 45 Fletcher A, Amery A, Birkenh Å Ger W, *et al.* Risks and benefits in the trial of the european working party on high blood pressure in the elderly. *Journal of Hypertension* 1991; **9**: 225–30.
- 46 Savage PJ, Pressel SL, Curb JD, *et al.* Influence of long-term, low-dose, diuretic-based, antihypertensive therapy on glucose, lipid, uric acid, and potassium levels in older men and women with isolated systolic hypertension: The Systolic Hypertension in the Elderly Program. *Archives of Internal Medicine* 1998; **158**: 741–51.
- 47 Cooper-DeHoff R, Cohen JD, Bakris GL, *et al.* Predictors of Development of Diabetes Mellitus in Patients With Coronary Artery Disease Taking Antihypertensive Medications (Findings from the INternational Verapamil SR-Trandolapril Study [INVEST]). *American Journal of Cardiology* 2006; **98**: 890–4.
- 48 Elliott WJ, Meyer PM. Incident diabetes in clinical trials of antihypertensive drugs: a network meta-analysis. *Lancet* 2007; **369**: 201–7.

- 49 Yusuf S, Healey JS, Pogue J, *et al.* Irbesartan in patients with atrial fibrillation. *New England Journal of Medicine* 2011; **364**: 928–38.
- 50 Grimm RH, Margolis KL, Papademetriou V, *et al.* Baseline characteristics of participants in the Antihypertensive and Lipid Lowering Treatment to Prevent Heart Attack Trial (ALLHAT). *Hypertension* 2001; **37**: 19–27.
- 51 Doyle AE. The Australian National blood pressure study. *Trends in Pharmacological Sciences* 1981; **2**: 293–6.
- 52 Wing LMH, Reid CM, Ryan P, *et al.* A comparison of outcomes with angiotensin-converting-enzyme inhibitors and diuretics for hypertension in the elderly. *New England Journal of Medicine* 2003; **348**: 583–92.
- 53 Gupta AK, Dahlof B, Dobson J, Sever PS, Wedel H, Poulter NR. Determinants of new-onset diabetes among 19,257 hypertensive patients randomized in the anglo-scandinavian cardiac outcomes trial-blood pressure lowering arm and the relative influence of antihypertensive medication. *Diabetes Care* 2008; **31**: 982–8.
- 54 Hansson L, Lindholm LH, Niskanen L, *et al.* Effect of angiotensin-converting-enzyme inhibition compared with conventional therapy on cardiovascular morbidity and mortality in hypertension: the Captopril Prevention Project (CAPPP) randomised trial. *Lancet* 1999; **353**: 611–6.
- 55 Nakao K, Hirata M, Oba K, *et al.* Role of diabetes and obesity in outcomes of the candesartan antihypertensive survival evaluation in Japan (CASE-J) trial. *Hypertension Research* 2010; **33**: 600–6.
- 56 Ogihara T, Saruta T, Rakugi H, *et al.* Rationale, study design and implementation of the COLM study: The combination of OLMesartan and calcium channel blocker or diuretic in high-risk elderly hypertensive patients. *Hypertension Research* 2009; **32**: 163–7.
- 57 Matsuzaki M, Ogihara T, Umemoto S, *et al.* Prevention of cardiovascular events with calcium channel blocker-based combination therapies in patients with hypertension: A randomized controlled trial. *Journal of Hypertension* 2011; **29**: 1649–59.
- 58 Kasanuki H, Hagiwara N, Hosoda S, *et al.* Angiotensin II receptor blocker-based vs. non-angiotensin II receptor blocker-based therapy in patients with angiographically documented coronary artery disease and hypertension: The Heart Institute of Japan Candesartan Randomized Trial for Evaluation in. *European Heart Journal* 2009; **30**: 1203–12.
- 59 Sharma AM, Pischon T, Engeli S. Effect of ramipril on cardiovascular events in high-risk patients. *New England Journal of Medicine* 2000; **343**.
- 60 Brown MJ, Palmer CR, Castaigne A, *et al.* Morbidity and mortality in patients randomised to double-blind treatment with a long-acting calcium-channel blocker or diuretic in the International Nifedipine GITS study: Intervention as a Goal in Hypertension Treatment (INSIGHT). *Lancet* 2000; **356**: 366–72.
- 61 Schrader J, Lüders S, Kulschewski A, *et al.* Morbidity and mortality after stroke, eprosartan compared with nitrendipine for secondary prevention: Principal results of a prospective randomized controlled study (MOSES). *Stroke* 2005; **36**: 1218–24.
- 62 Hansson L, Hedner T, Lund-Johansen P, *et al.* Randomised trial of effects of calcium antagonists compared with diuretics and  $\beta$ -blockers on cardiovascular morbidity and mortality in hypertension: The Nordic Diltiazem (NORDIL) study. *Lancet* 2000; **356**: 359–65.

- 63 Mann JFE, Anderson C, Gao P, *et al.* Dual inhibition of the renin-angiotensin system in high-risk diabetes and risk for stroke and other outcomes: Results of the ONTARGET trial. *Journal of Hypertension* 2013; **31**: 414–21.
- 64 Braunwald E, Domanski MJ, Fowler SE, *et al.* Angiotensin-converting-enzyme inhibition in stable coronary artery disease. *New England Journal of Medicine* 2004; **351**. DOI:10.1056/NEJMoa042739.
- 65 Randomised trial of a perindopril-based blood-pressure-lowering regimen among 6,105 individuals with previous stroke or transient ischaemic attack. *Lancet* 2001; **358**: 1033–41.
- 66 Dahlof B, Hansson L, Lindholm LH, *et al.* STOP-Hypertension 2: a prospective intervention trial of ‘newer’ versus ‘older’ treatment alternatives in old patients with hypertension. Swedish Trial in Old Patients with Hypertension. *Blood Press* 1993; **2**: 136–41.
- 67 Gasowski J, Staessen JA, Celis H, *et al.* Systolic hypertension in Europe (Syst-Eur) trial phase 2: Objectives, protocol, and initial progress. *Journal of Human Hypertension* 1999; **13**: 135–45.
- 68 Telmisartan T, Assessment R. Effects of the angiotensin-receptor blocker telmisartan on cardiovascular events in high-risk patients intolerant to angiotensin-converting enzyme inhibitors: a randomised controlled trial. *The Lancet* 2008; **372**: 1174–83.
- 69 Julius S, Kjeldsen SE, Weber M, *et al.* Outcomes in hypertensive patients at high cardiovascular risk treated with regimens based on valsartan or amlodipine: The VALUE randomised trial. *Lancet* 2004; **363**: 2022–31.
- 70 Sacco RL, Diener HC, Yusuf S, *et al.* Aspirin and extended-release dipyridamole versus clopidogrel for recurrent stroke. *New England Journal of Medicine* 2008; **359**: 1238–51.
- 71 Dahlöf B, Sever PS, Poulter NR, *et al.* Prevention of cardiovascular events with an antihypertensive regimen of amlodipine adding perindopril as required versus atenolol adding bendroflumethiazide as required, in the Anglo-Scandinavian Cardiac Outcomes Trial-Blood Pressure Lowering Arm (ASCOT-B. *Lancet* 2005; **366**: 895–906.
- 72 Ogihara T, Saruta T, Rakugi H, *et al.* Combinations of olmesartan and a calciumchannel blocker or a diuretic inelderly hypertensive patients: A randomized, controlled trial. *Journal of Hypertension* 2014; **32**: 2054–63.
- 73 Yusuf S, Teo KK, Pogue J, *et al.* Telmisartan, ramipril, or both in patients at high risk for vascular events. *New England Journal of Medicine* 2008; **358**: 1547–59.
- 74 Hansson L, Lindholm LH, Ekbom T, *et al.* Randomised trial of old and new antihypertensive drugs in elderly patients: Cardiovascular mortality and morbidity the Swedish trial in old patients with hypertension-2 study. *Lancet* 1999; **354**: 1751–6.
- 75 Staessen J, Fagard R, Thijs L, *et al.* Randomised double-blind comparison of placebo and active treatment for older patients with isolated systolic hypertension. The Systolic Hypertension in Europe (Syst-Eur) Trial Investigators. *Lancet*. 1997; **350**: 757–64.
- 76 Rahimi K, Canoy D, Nazarzadeh M, *et al.* Investigating the stratified efficacy and safety of pharmacological blood pressure-lowering: An overall protocol for individual patient-level data meta-analyses of over 300 000 randomised participants in the new phase of the Blood Pressure Lowering Treatm. *BMJ Open* 2019; **9**. DOI:10.1136/bmjopen-2018-028698.
